# Supplementary material for: Primaquine for uncomplicated Plasmodium vivax malaria in children younger than 15 years: a systematic review and individual patient data meta-analysis
Source: PubMed Central journal article supplement (PMC11480364; doi:10.1016/s2352-4642(24)00210-4), 2024-11
Supplement: mmc1.pdf [file mmc1.pdf]

# THE LANCET

## Child & Adolescent Health

### Supplementary appendix

This appendix formed part of the original submission and has been peer reviewed. We post it as supplied by the authors.

Supplement to: Commons RJ, Rajasekhar M, Allen EN, et al. Primaquine for uncomplicated *Plasmodium vivax* malaria in children younger than 15 years: a systematic review and individual patient data meta-analysis. *Lancet Child Adolesc Health* 2024; published online Sept 24. [https://doi.org/10.1016/S2352-4642\(24\)00210-4](https://doi.org/10.1016/S2352-4642(24)00210-4).

# APPENDIX

Commons RJ, Rajasekhar M, et al, Primaquine for uncomplicated *Plasmodium vivax* malaria in children younger than 15 years: a systematic review and individual patient data meta-analysis

Page

|                                                                                                                                                                                                                     |    |
|---------------------------------------------------------------------------------------------------------------------------------------------------------------------------------------------------------------------|----|
| <b>Checklist S1.</b> PRISMA-IPD                                                                                                                                                                                     | 3  |
| <b>Text S1.</b> Supplementary methods                                                                                                                                                                               | 7  |
| <b>Figure S1.</b> Directed acyclic graphs for the relationship between primaquine dose (exposure) and outcomes in children <15 years                                                                                | 12 |
| <b>Table S1.</b> Studies included in analysis                                                                                                                                                                       | 13 |
| <b>Table S2.</b> Study testing and inclusion criteria                                                                                                                                                               | 14 |
| <b>Table S3.</b> Study sites included in analysis                                                                                                                                                                   | 16 |
| <b>Table S4.</b> Reasons for studies not being included in analyses                                                                                                                                                 | 18 |
| <b>Table S5.</b> Studies eligible for the analyses but not included                                                                                                                                                 | 19 |
| <b>Figure S2.</b> Location of study sites for included studies                                                                                                                                                      | 21 |
| <b>Table S6.</b> Risk of bias assessment in randomised controlled studies                                                                                                                                           | 22 |
| <b>Table S7.</b> Risk of bias assessment in single arm observational studies                                                                                                                                        | 23 |
| <b>Table S8.</b> Comparison of baseline characteristics between included studies and eligible but not included studies                                                                                              | 24 |
| <b>Table S9.</b> Demographics and baseline characteristics for efficacy analysis by primaquine category                                                                                                             | 25 |
| <b>Figure S3.</b> Box plot of primaquine dose by age                                                                                                                                                                | 27 |
| <b>Figure S4.</b> Scatter plot of primaquine dose by A) age and B) weight categorised by presence of recurrence between day 7 and day 180                                                                           | 28 |
| <b>Figure S5.</b> Kaplan-Meier figure of cumulative incidence of recurrence between day 7 and day 365 for A) total primaquine dosing and use and B) intermittent primaquine dosing                                  | 29 |
| <b>Table S10.</b> Cumulative incidence of recurrence between day 7 and days 42, 90, 180 and 365 by study and primaquine category                                                                                    | 30 |
| <b>Table S11.</b> Sensitivity analyses estimating hazard ratios for <i>Plasmodium vivax</i> recurrence between days 7 and 180 by total primaquine dose                                                              | 32 |
| <b>Table S12.</b> Sensitivity analysis excluding one study at a time for hazard ratio of <i>Plasmodium vivax</i> recurrence between days 7 and 180 following primaquine treatment group compared with no primaquine | 33 |
| <b>Text S2.</b> Additional efficacy analysis results                                                                                                                                                                | 34 |
| <b>Figure S6.</b> Adjusted hazard ratio for recurrence between day 7 and 180 compared with primaquine total mg/kg dose for children                                                                                 | 35 |
| <b>Table S13.</b> Baseline characteristics and demographic features for gastrointestinal tolerability analysis by age categories                                                                                    | 36 |
| <b>Figure S7.</b> Distribution of primaquine daily dose by primaquine mg/kg daily dose category and age category                                                                                                    | 37 |

|                                                                                                                                                                                                                                                                         |    |
|-------------------------------------------------------------------------------------------------------------------------------------------------------------------------------------------------------------------------------------------------------------------------|----|
| <b>Figure S8.</b> Unadjusted risk of gastrointestinal symptoms in children on day 0, days 1-2 and days 5-7                                                                                                                                                              | 38 |
| <b>Figure S9.</b> Covariate-adjusted estimates for gastrointestinal intolerance on days 5-7 by primaquine daily dose categories and age categories                                                                                                                      | 39 |
| <b>Table S14.</b> Covariate-adjusted estimated percentages (95% CI) from sensitivity analyses for the composite gastrointestinal tolerability outcome assessed on days 5-7                                                                                              | 40 |
| <b>Table S15.</b> Covariate-adjusted estimated percentages (95% CI) from sensitivity analyses for the composite gastrointestinal tolerability outcome assessed on days 1-2, restricted to patients who started primaquine on day 0                                      | 41 |
| <b>Table S16.</b> Contribution of patients from each study included in the analysis of the primary composite gastrointestinal tolerability end point on days 5-7 to each primaquine dose category                                                                       | 42 |
| <b>Figure S10.</b> Sensitivity analysis for the covariate-adjusted estimated percentage of patients reporting gastrointestinal symptoms (95% CI) assessed on days 5-7, excluding one study at a time                                                                    | 43 |
| <b>Table S17.</b> Risk of acute vomiting on days 0-2 and 3-13 by primaquine daily dose categories in children                                                                                                                                                           | 44 |
| <b>Table S18.</b> Baseline characteristics and demographic features of patients included in the haematological safety analysis by age groups                                                                                                                            | 45 |
| <b>Table S19.</b> Details of patients experiencing haematological outcomes                                                                                                                                                                                              | 46 |
| <b>Figure S11.</b> Estimated percentage of children with G6PD activity $\geq 30\%$ developing mild, moderate or severe anaemia on days 2-3 or days 5-7 by primaquine daily dose groups                                                                                  | 47 |
| <b>Table S20.</b> Baseline characteristics and demographic features of patients in the adverse event meta-analysis, by age category                                                                                                                                     | 48 |
| <b>Table S21.</b> Patients reporting at least one adverse event within 28 days of initiating primaquine (or equivalent time schedule in placebo / no primaquine arms) in patients with <i>P. vivax</i> or mixed malaria infection, by age category and primaquine dose  | 50 |
| <b>Table S22.</b> Patients with any abdominal pain within 28 days of initiating primaquine (or equivalent time schedule in placebo / no primaquine arms) in patients with <i>P. vivax</i> or mixed malaria infection, by age category and primaquine dose               | 51 |
| <b>Table S23.</b> Patients with any anaemia within 28 days of initiating primaquine (or equivalent time schedule in placebo / no primaquine arms) in patients with <i>P. vivax</i> or mixed malaria infection, by age category and primaquine dose                      | 52 |
| <b>Table S24.</b> Patients with any methaemoglobinaemia reported within 28 days of initiating primaquine (or equivalent time schedule in placebo / no primaquine arms) in patients with <i>P. vivax</i> or mixed malaria infection, by age category and primaquine dose | 53 |
| <b>Table S25.</b> Patients with any diarrhoea within 28 days of initiating primaquine (or equivalent time schedule in placebo / no primaquine arms) in patients with <i>P. vivax</i> or mixed malaria infection, by age category and primaquine dose                    | 54 |
| <b>Table S26.</b> Patients with any anorexia within 28 days of initiating primaquine (or equivalent time schedule in placebo / no primaquine arms) in patients with <i>P. vivax</i> or mixed malaria infection, by age category and primaquine dose                     | 55 |
| <b>Table S27.</b> Patients with any vomiting within 28 days of initiating primaquine (or equivalent time schedule in placebo / no primaquine arms) in patients with <i>P. vivax</i> or mixed malaria infection, by age category and primaquine dose                     | 56 |
| <b>Table S28:</b> Description of serious adverse events considered by study investigator to be primaquine related (possibly, probably or definitely related)                                                                                                            | 57 |
| <b>References S1.</b>                                                                                                                                                                                                                                                   | 60 |

## Checklist S1. PRISMA-IPD Checklist of items to include when reporting a systematic review and meta-analysis of individual participant data (IPD)

| PRISMA-IPD Section/topic                                                                                                            | Item No | Checklist item                                                                                                                                                                                                                                                                                                                                                                                                                                                                                                          | Reported on page |
|-------------------------------------------------------------------------------------------------------------------------------------|---------|-------------------------------------------------------------------------------------------------------------------------------------------------------------------------------------------------------------------------------------------------------------------------------------------------------------------------------------------------------------------------------------------------------------------------------------------------------------------------------------------------------------------------|------------------|
| <b>Title</b>                                                                                                                        |         |                                                                                                                                                                                                                                                                                                                                                                                                                                                                                                                         |                  |
| Title                                                                                                                               | 1       | Identify the report as a systematic review and meta-analysis of individual participant data.                                                                                                                                                                                                                                                                                                                                                                                                                            | 1                |
| <b>Abstract</b>                                                                                                                     |         |                                                                                                                                                                                                                                                                                                                                                                                                                                                                                                                         |                  |
| Structured summary                                                                                                                  | 2       | Provide a structured summary including as applicable:                                                                                                                                                                                                                                                                                                                                                                                                                                                                   | 8                |
|                                                                                                                                     |         | <b>Background:</b> state research question and main objectives, with information on participants, interventions, comparators and outcomes.                                                                                                                                                                                                                                                                                                                                                                              |                  |
|                                                                                                                                     |         | <b>Methods:</b> report eligibility criteria; data sources including dates of last bibliographic search or elicitation, noting that IPD were sought; methods of assessing risk of bias.                                                                                                                                                                                                                                                                                                                                  | 9                |
|                                                                                                                                     |         | <b>Results:</b> provide number and type of studies and participants identified and number (%) obtained; summary effect estimates for main outcomes (benefits and harms) with confidence intervals and measures of statistical heterogeneity. Describe the direction and size of summary effects in terms meaningful to those who would put findings into practice.                                                                                                                                                      |                  |
|                                                                                                                                     |         | <b>Discussion:</b> state main strengths and limitations of the evidence, general interpretation of the results and any important implications.                                                                                                                                                                                                                                                                                                                                                                          |                  |
| <b>Other:</b> report primary funding source, registration number and registry name for the systematic review and IPD meta-analysis. |         |                                                                                                                                                                                                                                                                                                                                                                                                                                                                                                                         |                  |
| <b>Introduction</b>                                                                                                                 |         |                                                                                                                                                                                                                                                                                                                                                                                                                                                                                                                         |                  |
| Rationale                                                                                                                           | 3       | Describe the rationale for the review in the context of what is already known.                                                                                                                                                                                                                                                                                                                                                                                                                                          | 11               |
| Objectives                                                                                                                          | 4       | Provide an explicit statement of the questions being addressed with reference, as applicable, to participants, interventions, comparisons, outcomes and study design (PICOS). Include any hypotheses that relate to particular types of participant-level subgroups.                                                                                                                                                                                                                                                    | 11-12            |
| <b>Methods</b>                                                                                                                      |         |                                                                                                                                                                                                                                                                                                                                                                                                                                                                                                                         |                  |
| Protocol and registration                                                                                                           | 5       | Indicate if a protocol exists and where it can be accessed. If available, provide registration information including registration number and registry name. Provide publication details, if applicable.                                                                                                                                                                                                                                                                                                                 | 13               |
| Eligibility criteria                                                                                                                | 6       | Specify inclusion and exclusion criteria including those relating to participants, interventions, comparisons, outcomes, study design and characteristics (e.g. years when conducted, required minimum follow-up). Note whether these were applied at the study or individual level i.e. whether eligible participants were included (and ineligible participants excluded) from a study that included a wider population than specified by the review inclusion criteria. The rationale for criteria should be stated. | 13; Text S1      |
| Identifying studies -                                                                                                               | 7       | Describe all methods of identifying published and unpublished studies including, as applicable: which bibliographic databases were searched with dates of coverage; details of any hand searching including of conference proceedings; use of study registers                                                                                                                                                                                                                                                           | 13; Text S1      |

|                                                |    |                                                                                                                                                                                                                                                                                                                                                                                                                                                                                                                                                                                                                                                                                                                                                                                                                                           |                       |
|------------------------------------------------|----|-------------------------------------------------------------------------------------------------------------------------------------------------------------------------------------------------------------------------------------------------------------------------------------------------------------------------------------------------------------------------------------------------------------------------------------------------------------------------------------------------------------------------------------------------------------------------------------------------------------------------------------------------------------------------------------------------------------------------------------------------------------------------------------------------------------------------------------------|-----------------------|
| information sources                            |    | and agency or company databases; contact with the original research team and experts in the field; open adverts and surveys. Give the date of last search or elicitation.                                                                                                                                                                                                                                                                                                                                                                                                                                                                                                                                                                                                                                                                 |                       |
| Identifying studies - search                   | 8  | Present the full electronic search strategy for at least one database, including any limits used, such that it could be repeated.                                                                                                                                                                                                                                                                                                                                                                                                                                                                                                                                                                                                                                                                                                         | Text S1               |
| Study selection processes                      | 9  | State the process for determining which studies were eligible for inclusion.                                                                                                                                                                                                                                                                                                                                                                                                                                                                                                                                                                                                                                                                                                                                                              | 13; Text S1           |
| Data collection processes                      | 10 | Describe how IPD were requested, collected and managed, including any processes for querying and confirming data with investigators. If IPD were not sought from any eligible study, the reason for this should be stated (for each such study).                                                                                                                                                                                                                                                                                                                                                                                                                                                                                                                                                                                          | 13; Ref 7-8           |
|                                                |    | If applicable, describe how any studies for which IPD were not available were dealt with. This should include whether, how and what aggregate data were sought or extracted from study reports and publications (such as extracting data independently in duplicate) and any processes for obtaining and confirming these data with investigators.                                                                                                                                                                                                                                                                                                                                                                                                                                                                                        |                       |
| Data items                                     | 11 | Describe how the information and variables to be collected were chosen. List and define all study level and participant level data that were sought, including baseline and follow-up information. If applicable, describe methods of standardising or translating variables within the IPD datasets to ensure common scales or measurements across studies.                                                                                                                                                                                                                                                                                                                                                                                                                                                                              | 13-14; Text S1        |
| IPD integrity                                  | A1 | Describe what aspects of IPD were subject to data checking (such as sequence generation, data consistency and completeness, baseline imbalance) and how this was done.                                                                                                                                                                                                                                                                                                                                                                                                                                                                                                                                                                                                                                                                    | Ref 7-8               |
| Risk of bias assessment in individual studies. | 12 | Describe methods used to assess risk of bias in the individual studies and whether this was applied separately for each outcome. If applicable, describe how findings of IPD checking were used to inform the assessment. Report if and how risk of bias assessment was used in any data synthesis.                                                                                                                                                                                                                                                                                                                                                                                                                                                                                                                                       | 14-15                 |
| Specification of outcomes and effect measures  | 13 | State all treatment comparisons of interests. State all outcomes addressed and define them in detail. State whether they were pre-specified for the review and, if applicable, whether they were primary/main or secondary/additional outcomes. Give the principal measures of effect (such as risk ratio, hazard ratio, difference in means) used for each outcome.                                                                                                                                                                                                                                                                                                                                                                                                                                                                      | 14-16, Box 1, Text S1 |
| Synthesis methods                              | 14 | Describe the meta-analysis methods used to synthesise IPD. Specify any statistical methods and models used. Issues should include (but are not restricted to): <ul style="list-style-type: none"> <li>• Use of a one-stage or two-stage approach.</li> <li>• How effect estimates were generated separately within each study and combined across studies (where applicable).</li> <li>• Specification of one-stage models (where applicable) including how clustering of patients within studies was accounted for.</li> <li>• Use of fixed or random effects models and any other model assumptions, such as proportional hazards.</li> <li>• How (summary) survival curves were generated (where applicable).</li> <li>• Methods for quantifying statistical heterogeneity (such as <math>I^2</math> and <math>t^2</math>).</li> </ul> | 14-16, Box 1, Text S1 |

|                                     |    |                                                                                                                                                                                                                                                                                                                                                                                                                                                                   |                                                  |
|-------------------------------------|----|-------------------------------------------------------------------------------------------------------------------------------------------------------------------------------------------------------------------------------------------------------------------------------------------------------------------------------------------------------------------------------------------------------------------------------------------------------------------|--------------------------------------------------|
|                                     |    | <ul style="list-style-type: none"> <li>• How studies providing IPD and not providing IPD were analysed together (where applicable).</li> <li>• How missing data within the IPD were dealt with (where applicable).</li> </ul>                                                                                                                                                                                                                                     |                                                  |
| Exploration of variation in effects | A2 | If applicable, describe any methods used to explore variation in effects by study or participant level characteristics (such as estimation of interactions between effect and covariates). State all participant-level characteristics that were analysed as potential effect modifiers, and whether these were pre-specified.                                                                                                                                    | 14-16, Box 1, Text S1                            |
| Risk of bias across studies         | 15 | Specify any assessment of risk of bias relating to the accumulated body of evidence, including any pertaining to not obtaining IPD for particular studies, outcomes or other variables.                                                                                                                                                                                                                                                                           | 15                                               |
| Additional analyses                 | 16 | Describe methods of any additional analyses, including sensitivity analyses. State which of these were pre-specified.                                                                                                                                                                                                                                                                                                                                             | 14-16, Text S1                                   |
| <b>Results</b>                      |    |                                                                                                                                                                                                                                                                                                                                                                                                                                                                   |                                                  |
| Study selection and IPD obtained    | 17 | Give numbers of studies screened, assessed for eligibility, and included in the systematic review with reasons for exclusions at each stage. Indicate the number of studies and participants for which IPD were sought and for which IPD were obtained. For those studies where IPD were not available, give the numbers of studies and participants for which aggregate data were available. Report reasons for non-availability of IPD. Include a flow diagram. | 18, Figure 1                                     |
| Study characteristics               | 18 | For each study, present information on key study and participant characteristics (such as description of interventions, numbers of participants, demographic data, unavailability of outcomes, funding source, and if applicable duration of follow-up). Provide (main) citations for each study. Where applicable, also report similar study characteristics for any studies not providing IPD.                                                                  | Tables S1-S3                                     |
| IPD integrity                       | A3 | Report any important issues identified in checking IPD or state that there were none.                                                                                                                                                                                                                                                                                                                                                                             | 18                                               |
| Risk of bias within studies         | 19 | Present data on risk of bias assessments. If applicable, describe whether data checking led to the up-weighting or down-weighting of these assessments. Consider how any potential bias impacts on the robustness of meta-analysis conclusions.                                                                                                                                                                                                                   | Tables S6-S7                                     |
| Results of individual studies       | 20 | For each comparison and for each main outcome (benefit or harm), for each individual study report the number of eligible participants for which data were obtained and show simple summary data for each intervention group (including, where applicable, the number of events), effect estimates and confidence intervals. These may be tabulated or included on a forest plot.                                                                                  | 18-21, Appendix pp 23-26, 30, 36, 42, 45, 49, 58 |
| Results of syntheses                | 21 | Present summary effects for each meta-analysis undertaken, including confidence intervals and measures of statistical heterogeneity. State whether the analysis was pre-specified, and report the numbers of studies and participants and, where applicable, the number of events on which it is based.                                                                                                                                                           | 18-21                                            |
|                                     |    | When exploring variation in effects due to patient or study characteristics, present summary interaction estimates for each characteristic examined, including confidence intervals and measures of statistical heterogeneity. State whether the analysis was pre-specified. State whether any interaction is consistent across trials.                                                                                                                           |                                                  |
|                                     |    | Provide a description of the direction and size of effect in terms meaningful to those who would put findings into practice.                                                                                                                                                                                                                                                                                                                                      |                                                  |

|                             |    |                                                                                                                                                                                                                                                                                                                                       |                                               |
|-----------------------------|----|---------------------------------------------------------------------------------------------------------------------------------------------------------------------------------------------------------------------------------------------------------------------------------------------------------------------------------------|-----------------------------------------------|
| Risk of bias across studies | 22 | Present results of any assessment of risk of bias relating to the accumulated body of evidence, including any pertaining to the availability and representativeness of available studies, outcomes or other variables.                                                                                                                | 18, Tables S6-S8                              |
| Additional analyses         | 23 | Give results of any additional analyses (e.g. sensitivity analyses). If applicable, this should also include any analyses that incorporate aggregate data for studies that do not have IPD. If applicable, summarise the main meta-analysis results following the inclusion or exclusion of studies for which IPD were not available. | 18-21, Appendix pp 32-34, 38-44, 46-47, 51-57 |
| <b>Discussion</b>           |    |                                                                                                                                                                                                                                                                                                                                       |                                               |
| Summary of evidence         | 24 | Summarise the main findings, including the strength of evidence for each main outcome.                                                                                                                                                                                                                                                | 22                                            |
| Strengths and limitations   | 25 | Discuss any important strengths and limitations of the evidence including the benefits of access to IPD and any limitations arising from IPD that were not available.                                                                                                                                                                 | 22-25                                         |
| Conclusions                 | 26 | Provide a general interpretation of the findings in the context of other evidence.                                                                                                                                                                                                                                                    | 22-25                                         |
| Implications                | A4 | Consider relevance to key groups (such as policy makers, service providers and service users). Consider implications for future research.                                                                                                                                                                                             | 24-25                                         |
| <b>Funding</b>              |    |                                                                                                                                                                                                                                                                                                                                       |                                               |
| Funding                     | 27 | Describe sources of funding and other support (such as supply of IPD), and the role in the systematic review of those providing such support.                                                                                                                                                                                         | 26-27                                         |

© Reproduced with permission of the PRISMA IPD Group, which encourages sharing and reuse for non-commercial purposes

## **Text S1. Supplementary methods**

### ***Systematic review***

All prospective *P. vivax* antimalarial clinical trials published between Jan 1, 2000 and July 26, 2024 were identified by the application of the key terms through Medline (Pubmed), Web of Science, Embase, Scopus and Cochrane Central. Abstracts of all references containing any mention of antimalarial drugs were manually checked to confirm prospective clinical trials, with review of full text when needed. This review was based on an original process that is documented in detail in Commons *et al*, Int J Parasitol Drug Drug Res 2017.<sup>6</sup> The year of the study was taken as the year of publication, although the start and end dates of patient enrolment were also recorded.

The following search terms were used in Pubmed: vivax AND (artefenomel OR arterolane OR amodiaquine OR atovaquone OR artemisinin OR arteether OR artesunate OR artemether OR artemotil OR azithromycin OR artemin OR chloroquine OR chlorproguanil OR cycloguanil OR clindamycin OR coartem OR dapsone OR dihydroartemisinin OR duo-cotecxin OR doxycycline OR halofantrine OR lumefantrine OR lariam OR malarone OR mefloquine OR naphthoquine OR naphthoquinone OR piperazine OR primaquine OR proguanil OR pyrimethamine OR pyronaridine OR proguanil OR quinidine OR quinine OR riamet OR sulphadoxine OR tetracycline OR tafenoquine); filtered for publication from Jan 1, 2000 to July 26, 2024.

### ***Inclusion and exclusion criteria***

Studies were included if they:

- had active follow up of 28 days or more,
- included at least one patient aged <15 years,
- included a treatment group with daily primaquine given over multiple days where primaquine was commenced within 7 days of schizontocidal treatment and was co-administered with a schizontocidal antimalarial.

Studies on prevention, prophylaxis, reviews, animal studies, patients with severe malaria, where schizontocidal treatment was unsupervised or where data were extracted retrospectively from medical records outside of a planned trial were excluded.

Patients were excluded if

- they were  $\geq 15$  years old
- they had severe malaria on enrolment including haemoglobin <5 g/dL or haematocrit <15%,
- received adjunctive antimalarials during the first 14 days,
- were treated with an alternative hypnozoitocidal agent,
- received primaquine more than 7 days after starting antimalarial treatment,
- had a protocol violation in the original study, or
- were missing age, sex, or primaquine dose.

Inclusion in the efficacy meta-analysis was further restricted to:

- studies with 42 days or more follow up and
- patients with data on day 0 parasitaemia.

Inclusion in the gastrointestinal tolerability meta-analysis was further restricted to:

- studies with data from pre-specified symptom questionnaires (symptom checklist),
- patients with data on vivax parasite count at baseline,
- patients starting primaquine by day 2,



- patients not receiving intermittent primaquine (defined as primaquine administered weekly or monthly, rather than daily) and
- patients with data on daily primaquine dose.

Inclusion in the haematological safety meta-analysis was further restricted to:

- patients with available data on day 0 haemoglobin levels,
- patients with an available haemoglobin measurement on at least one more day during the follow-up period,
- patients starting primaquine by day 2 and
- patients with data on daily primaquine dose.

Inclusion in the adverse event meta-analysis was further restricted to:

- studies that shared data on adverse events in patients with confirmed *P. vivax* infection.

### **Definitions**

The primaquine dose administered was calculated from the number of tablets administered to each patient. If the daily tablet counts were not available, doses were back-calculated using the dosing scheme available from study protocols, or if this was not available doses were assumed according to the planned dosing regimen.

Anaemia was defined as mild (Hb  $\geq 8$  g/dL and  $< 11$  g/dl), moderate anaemia (Hb  $\geq 5$  g/dL and Hb  $< 8$  g/dl) or severe anaemia (Hb  $< 5$  g/dL).

G6PD deficiency was classified as severely deficient ( $< 30\%$  activity or a deficient qualitative test) or normal ( $\geq 30\%$  activity or a normal qualitative test). Patients were also categorised into: severely deficient ( $< 30\%$  activity or a deficient qualitative test), intermediate deficiency ( $\geq 30\%$  to  $< 70\%$  activity) or normal ( $\geq 70\%$  activity).

The nutritional status of children aged  $< 5$  years of age was calculated as a weight-for-age z-score, using the igrowup package developed by WHO.<sup>47</sup> Those with weight-for-age z-scores  $< -2$  (i.e. below the 3rd centile) were classified as underweight-for-age (termed underweight). Weight-for-age Z scores were set to missing if the score is less than  $-6$  or greater than  $6$ .

Transmission intensity of study sites was classified as low, moderate and high based on the malaria incidence estimates obtained for subnational regions and year from the Malaria Atlas Project.<sup>48</sup> Relapse periodicity (the time between vivax relapses) was classified as *low (long) and high (short)* according to Battle's regions, with high periodicity considered to include regions where the median periodicity is  $< 47$  days.<sup>49</sup>

CYP2D6 status was classified by expected phenotype using the activity score (AS) system<sup>50,51</sup> to estimate phenotype from genotype. The activity score assigns values of 0 to 2 to the CYP2D6 alleles identified in the patient as follows: zero, no-function alleles (\*4, \*4xN, \*5); 0.25, substantially decreased-function (\*10); 0.5, decreased-function (\*9, \*17, \*29, \*41); 1, normal-function (\*1, \*2, \*39) and 2, increased function (\*1xN, \*2xN). The AS of diplotypes results from the sum of the assigned value to each allele. Patients with AS = 0 are designated as poor metabolisers. Patients with AS = 0.25, 0.5, 0.75 and 1 were designated as intermediate metabolisers. Patients with AS  $> 2.25$  were designated as ultrarapid metabolisers, respectively. Patients with AS = 1.25, 1.5, 2 and 2.25 were designated as normal metabolisers.<sup>52</sup>

South American studies that treat patients for 7 to 9 days depending on their bodyweight were considered with the 7-day treatment regimens. Primaquine treatment supervision were classified

as supervised if all doses were observed, partially supervised if  $\geq 2$  doses were observed or unsupervised if 0 or 1 dose was observed.

Gastrointestinal tolerability was assessed primarily on days 5-7 to reduce confounding related to symptomatic malaria or schizontocidal treatment. Symptoms on days 1-2 were also presented to allow comparison during the initial therapeutic response.

### ***Additional outcome definitions and justification***

Adverse events and serious adverse events were considered as such according to the primary studies' definitions, assumed to be the following unless otherwise indicated:

- Adverse events: Any untoward medical occurrence in a patient or clinical investigation subject administered a pharmaceutical product and which does not necessarily have a causal relationship with this treatment. An adverse event can therefore be any unfavourable and unintended sign (including an abnormal laboratory finding), symptom, or disease temporally associated with the use of a medicinal (investigational) product, whether or not related to the medicinal (investigational) product (ICH E6).
- Serious adverse events: A serious adverse event (experience) is any untoward medical occurrence that results in death or is life-threatening, requires inpatient hospitalisation or prolongation of existing hospitalisation; results in persistent or significant disability/incapacity or requires intervention to prevent permanent impairment or damage; is a congenital anomaly/birth defect; or other serious, important medical events.

The term "life-threatening" in the definition of "serious" adverse event, refers to an event in which the patient was at risk of death at the time of the event (it does not refer to an event that hypothetically might have caused death if it were more severe) (ICH E2A).

Medical and scientific judgement should be exercised in deciding whether expedited reporting is appropriate in other situations, such as important medical events that may not be immediately life-threatening or result in death or hospitalisation, but may jeopardise the patient or may require intervention to prevent one of the other outcomes listed in the definition above; these are also usually considered serious. Examples of such events are intensive treatment in an emergency room or at home for allergic bronchospasm; blood dyscrasias or convulsions that do not result in hospitalisation; or development of drug dependency or drug abuse (ICH E2A).

Grading classification and causality assessment of adverse events were as assessed by the primary study, and standardised as mild (grade 1), moderate (grade 2), severe (grade 3) and life-threatening (grade 4).

Only adverse events known to occur after starting primaquine (or equivalent dose in control groups) were considered (i.e., treatment-emergent). If the day of adverse event onset was missing, or time of onset in relation to the primaquine dose was not recorded, the investigator was contacted for clarification, whenever possible.

### ***Analysis***

#### ***Efficacy analysis***

For the Kaplan-Meier analysis for cumulative incidence of recurrence between day 7 and day of outcome, patients were left censored (origin) at day 7 and right censored (end time) at the first of: the day of recurrent malaria parasitaemia, the day prior to a >60 day blood smear gap, the day last reviewed, the last day of study follow up or the day of outcome.

In the Cox regression analyses body weight was excluded due to collinearity with age. Relapse periodicity, geographical region and transmission intensity were not included due to their

collinearity and the expectation that they would not satisfy the proportional hazards assumption due to differing time to first relapse in differing regions. Baseline haemoglobin and temperature were not included due to less complete data and no expected impact on the exposure of interest. Schizontocidal treatment was not included due to collinearity with study site, which was the clustering variable. The proportional hazards assumption was checked by visual inspection of the log-log plot ( $-\log_e[-\log_e(\text{survival probability})]$  plotted against  $\log_e(\text{analysis time})$ ). The appropriateness of the assumption of linearity of the association between the outcome and the continuous covariates was confirmed using fractional polynomials. Additional subgroup analyses were undertaken sub-categorising childhood age into <5 years and 5 to <15 years. The <1 year old children were included in the <5 year category due to small numbers of patients in this age group.

Sensitivity analyses were undertaken restricting the outcome to recurrences between day 28 and 180, restricting the analysis to patients where the actual dose of primaquine administered was known, restricted to patients treated with chloroquine, restricted to studies with at least 180 days follow up, restricted to studies with treatment groups comparing primaquine to no primaquine, without shared frailty for study site and by removal of one study site at a time to determine the coefficient of variation.

To investigate the relationship between the continuous mg/kg dose of primaquine and the predicted rate of recurrence between day 7 and day 180, a restricted cubic spline model was used with four knots at default locations (5<sup>th</sup>, 35<sup>th</sup>, 65<sup>th</sup> and 95<sup>th</sup> percentiles).

#### *Gastrointestinal tolerability analysis*

Generalised estimating equations modified Poisson models were used to assess the association between primaquine daily dose and the presence of the composite outcome on days 5-7 or days 1-2, adjusted for age, sex and ( $\log_{10}$ ) baseline parasite density with a log link, clustering by study site, exchangeable correlation structure and cluster robust error estimates. From each model the covariate-adjusted percentage of patients reporting the outcome was estimated at the mean values of the covariates. The linearity of the relationship between the quantitative variables (age and parasitaemia) and the outcome variable was assessed using fractional polynomial regression models, as well as the impact on model estimates of the effect of primaquine dosing on the outcome when adjusting for these confounders assuming either a linear or nonlinear association.

The risk of bias in the gastrointestinal tolerability analysis due to missing data is expected to be low based on the small proportion of patients with missing data for the confounders.

The risk of the composite gastrointestinal outcome (95% Confidence Intervals (CIs)) was calculated as the proportion of the total number of patients asked about the symptoms vomiting, diarrhoea or anorexia as part of a symptom checklist on any day between days 5-7. The 95% confidence intervals were estimated as Agresti-Coull confidence intervals.

The risk of acute vomiting was calculated as the number of patients reported to have vomited within an hour of a primaquine dose on days 0-2 and on days 3-13 as a proportion of the patients for whom these data were collected. The risks were stratified by primaquine daily dose categories and age categories (<5 years, 5 to <15 years).

Sensitivity analyses were performed using generalised estimating equations (modified Poisson models) as specified above, but with data restricted as specified for each analysis. In analyses where the modified Poisson regression models did not converge, mixed effects logistic regression models were fitted. All models adjusted for age, sex, and ( $\log_{10}$ ) baseline parasite density, with

clustering by study site, and subsequently, covariate adjusted percentages were estimated at the means values of the covariates.

#### *Haematological safety analysis*

The percentage of patients experiencing each of the primary and secondary outcomes was calculated as the number of patients experiencing the outcome as a percentage of the total number of patients for whom data on haemoglobin were available in the time frame being examined.

In a post hoc analysis, the risk of anaemia by primaquine daily dose category was estimated using generalised estimating equations modified Poisson models, adjusting for age, sex and ( $\log_{10}$ ) baseline parasite density and baseline haemoglobin, with a log link, clustering by study site, exchangeable correlation structure and cluster robust error estimates. The covariate-adjusted percentage of patients reporting the outcome was estimated at the mean values of the covariates.

#### *Adverse event analysis*

The percentage of patients (95% CI) with the following events within 28 days after the first primaquine administration are presented by primaquine dose and age-category subgroups: serious adverse events, any adverse event, haemoglobinuria, anaemia, leucopenia, methaemoglobinaemia, vomiting, anorexia, diarrhoea, abdominal pain, QT prolongation (data permitting).

A listing of adverse events by MedDRA System Organ Class and Preferred Term were described, detailing daily and total primaquine dose by day of adverse event, adverse event day in relation to primaquine initiation, and adverse event severity, relatedness and outcome, age/sex, schizontocidal drug, G6PD status and other relevant variables.

**Figure S1. Directed acyclic graphs for the relationship between primaquine dose (exposure) and outcomes in children <15 years**

A

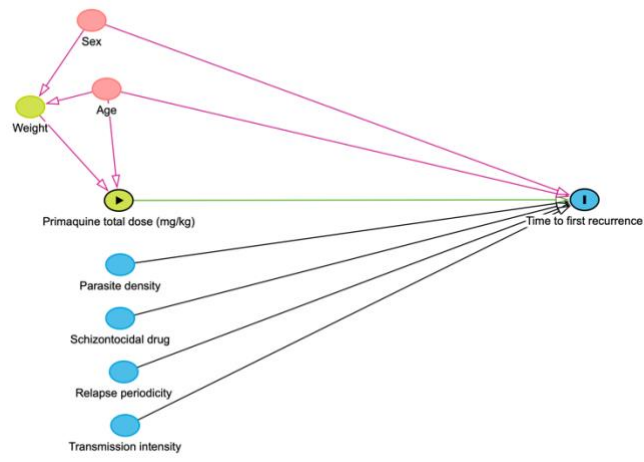

B

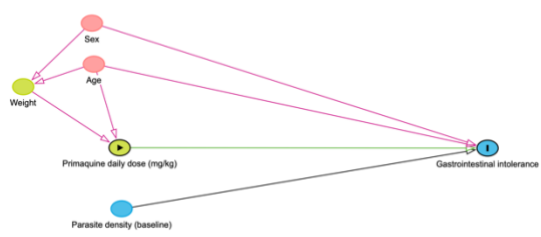

C

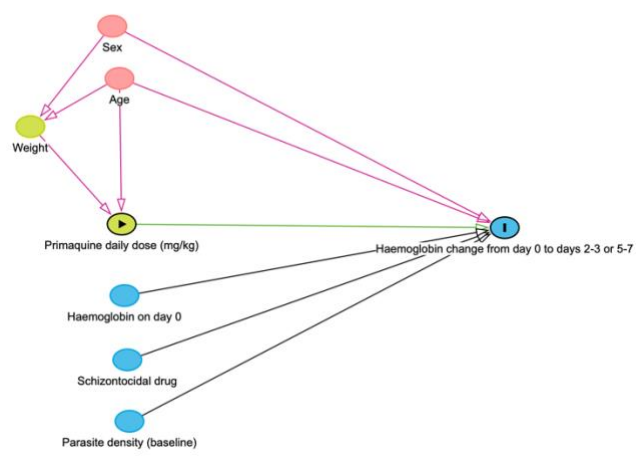

Green circles with triangles show exposures, blue circles with 'I' show outcomes, red circles show confounders and plain blue circles show other prognostic variables (A) The relationship between total primaquine dose in mg/kg and time to first *P. vivax* recurrence; (B) The relationship between daily primaquine dose in mg/kg and gastrointestinal intolerance and (C) The relationship between daily primaquine dose in mg/kg and haemoglobin on days 2-3 or days 5-7.

**Table S1. Studies included in analysis**

| Author-year                         | Country       | Recruitment Period | Age range | Follow up (days) | Included treatment groups*                                                   | PQ supervision | Randomised         | Patients available (children) | Included in GI tolerability analysis | Included in adverse event analysis | Included in haematology analysis | Included in efficacy analysis |
|-------------------------------------|---------------|--------------------|-----------|------------------|------------------------------------------------------------------------------|----------------|--------------------|-------------------------------|--------------------------------------|------------------------------------|----------------------------------|-------------------------------|
| Hasugian-2007 <sup>15</sup>         | Indonesia     | 2005               | 1-56      | 84               | AsAq_Pq_4.2_14d_D2, Dp_Pq_4.2_14d_D2                                         | No             | Yes                | 75                            | Yes                                  | No                                 | Yes                              | Yes                           |
| Leslie-2008 <sup>16</sup>           | Pakistan      | 2004 – 2006        | 4-80      | 330              | Cq, Cq_Pq_7.0_14d_D0                                                         | Full           | Yes                | 154                           | No                                   | No                                 | Yes                              | No                            |
| Abdallah-2012 <sup>28</sup>         | Sudan         | 2011               | 4-60      | 28               | Al_Pq_4.2_14d_D0                                                             | No             | No                 | 12                            | Yes                                  | No                                 | No                               | No                            |
| Barber-2013 <sup>29</sup>           | Malaysia      | 2010 - 2015        | 13-62     | 42               | Cq/ACT +/- Pq                                                                | No             | No                 | 3                             | Yes                                  | No                                 | Yes                              | Yes                           |
| Pasaribu-2013 <sup>17</sup>         | Indonesia     | 2010 - 2012        | 2-70      | 365              | AsAq_Pq_3.5_14d_D0, Dp_Pq_3.5_14d_D0                                         | Full           | Yes                | 174                           | Yes                                  | No                                 | Yes                              | Yes                           |
| Marques-2014 <sup>30</sup>          | Brazil        | 2007 – 2008        | 13-65     | 28               | Cq_Pq_3.5_7-9d_D0                                                            | Full           | No                 | 4                             | No                                   | No                                 | Yes                              | No                            |
| Gomes-2015 <sup>31</sup>            | Brazil        | 2011               | 10-56     | 28               | Cq_Pq_3.5_7-12d_D0                                                           | Full           | No                 | 10                            | No                                   | No                                 | No                               | No                            |
| Gonzalez-Ceron-2015 <sup>18</sup>   | Mexico        | 2008 - 2010        | 3-78      | 365              | Cq_Pq_3.5_14d_D0                                                             | Full           | Yes                | 45                            | Yes                                  | No                                 | No                               | Yes                           |
| Thanh-2015 <sup>32</sup>            | Vietnam       | 2009 – 2010        | 3-60      | 28               | Cq_Pq_5.0_10d_D0                                                             | Full           | No                 | 160                           | Yes                                  | No                                 | Yes                              | No                            |
| Yuan-2015 <sup>33</sup>             | Myanmar       | 2012 - 2013        | 1-77      | 42               | Cq_Pq_3.0_8d_D0                                                              | Partial        | No                 | 437                           | No                                   | No                                 | No                               | Yes                           |
| Ley-2016 <sup>34</sup>              | Bangladesh    | 2014 – 2015        | 1-66      | 30               | Cq_Pq_3.5_14d_D2                                                             | No             | No                 | 27                            | No                                   | No                                 | Yes                              | No                            |
| Longley-2016 <sup>35</sup>          | Thailand      | 2014               | 7-71      | 270              | Cq_Pq_3.5_14d_D1                                                             | Full           | No                 | 17                            | No                                   | No                                 | No                               | Yes                           |
| Zuluaga-Idarraga-2016 <sup>36</sup> | Colombia      | 2012 - 2013        | 4-71      | 180              | Cq_Pq_3.5_14d_D0                                                             | Full           | No                 | 18                            | Yes                                  | No                                 | No                               | Yes                           |
| Abreha-2017 <sup>19</sup>           | Ethiopia      | 2012 - 2014        | 1-67      | 365              | Al, Al_Pq_3.5_14d_D2, Cq, Cq_Pq_3.5_14d_D2                                   | Partial        | Yes                | 156                           | Yes                                  | Yes                                | Yes                              | Yes                           |
| Awab-2017 <sup>20</sup>             | Afghanistan   | 2009 - 2013        | 2-84      | 390              | Cq, Cq_Pq_3.5_14d_D0                                                         | Partial        | Yes                | 257                           | Yes                                  | Yes                                | Yes                              | Yes                           |
| Brasil-2018 <sup>37</sup>           | Brazil        | 2012 – 2014        | 9m-92     | 180              | Cq_Pq_3.5_7d_D0                                                              | No             | No                 | 67                            | No                                   | No                                 | No                               | No                            |
| Chu-2018 <sup>21</sup>              | Thailand      | 2010 - 2011        | 1-63      | 365              | Cq, Cq_Pq_7.0_14d_D0                                                         | Full           | Yes                | 211                           | No                                   | Yes                                | Yes                              | Yes                           |
| Grigg-2018 <sup>38</sup>            | Malaysia      | 2013 - 2015        | 8m-65     | 230              | Cq/ACT +/- Pq                                                                | No             | No                 | 19                            | No                                   | No                                 | Yes                              | Yes                           |
| Hamid-2018 <sup>22</sup>            | Sudan         | 2015-2016          | 2-70      | 42               | AsSP_Pq_3.5_14d_D2, AsSP                                                     | No             | Yes                | 32                            | Yes                                  | Yes                                | Yes                              | Yes                           |
| Chu-2019 <sup>23</sup>              | Thailand      | 2012 - 2014        | 1-63      | 365              | Cq_Pq_7.0_14d_D0, Cq_Pq_7.0_7d_D0, Dp_Pq_7.0_14d_D0, Dp_Pq_7.0_7d_D0         | Full           | Yes                | 206                           | No                                   | Yes                                | Yes                              | Yes                           |
| de Sena-2019 <sup>39</sup>          | Brazil        | 2016 - 2017        | 2-14      | 42               | Cq_Pq_3.5_7d_D0                                                              | Partial        | No                 | 113                           | No                                   | No                                 | No                               | Yes                           |
| Ladeia-Andrade-2019 <sup>24</sup>   | Brazil        | 2014 - 2015        | 7-60      | 180              | Cq_Pq_3.5_7d_D0                                                              | Full           | Yes                | 24                            | Yes                                  | No                                 | Yes                              | Yes                           |
| Rijal-2019 <sup>25</sup>            | Nepal         | 2015 - 2016        | 5-75      | 365              | Cq, Cq_Pq_3.5_14d_D0                                                         | Partial        | Yes                | 13                            | Yes                                  | No                                 | Yes                              | Yes                           |
| Taylor-2019 <sup>26</sup>           | Multinational | 2014 - 2017        | 9m-94     | 365              | Cq, Cq_Pq_7.0_14d_D0, Cq_Pq_7.0_7d_D0, Dp, Dp_Pq_7.0_14d_D0, Dp_Pq_7.0_7d_D0 | Full           | Yes                | 1013                          | Yes                                  | Yes                                | Yes                              | Yes                           |
| Xu-2020 <sup>40</sup>               | Myanmar       | 2014 – 2016        | 3-59      | 28               | Cq_Pq_3.5_14d_D0                                                             | Full           | No                 | 150                           | No                                   | No                                 | No                               | No                            |
| Poespoprodjo-2022 <sup>27</sup>     | Indonesia     | 2016-2018          | 1-63      | 180              | Dp_Pq_7.0_14d_D2 (partially supervised), Dp_Pq_7.0_14d_D2 (unsupervised)     | Partial/No     | Cluster randomised | 88                            | Yes                                  | No                                 | Yes                              | Yes                           |
| Karunajeewa-unpublished             | Vanuatu       | 2013               | 2-35      | 84               | Al, Al_Pq_3.5_14d_D0, Al_Pq_7.0_14d_D0                                       | Full           | Yes                | 29                            | Yes                                  | No                                 | Yes                              | Yes                           |

ACT – artemisinin-based combination treatment; As – artesunate; Al – artemether-lumefantrine; Aq – amodiaquine; Cq – chloroquine; Dp – dihydroartemisinin-piperazine; GI – gastrointestinal; Mf – mefloquine; PQ/Pq – primaquine; SP – sulfadoxine-pyrimethamine; \*Treatment code describes (schizontocidal drug)\_(hypnozoitocidal drug)\_(total primaquine dose)\_(duration of primaquine treatment eg 14d = 14 days)\_(primaquine start day)

**Table S2. Study testing and inclusion criteria**

| Author-year                         | Hb exclusion criteria | G6PD testing undertaken                                    | G6PD activity included                     | G6PD data available | Days symptom checklist undertaken and data available | Days Hb/Hct measured and data available | CYP2D6 data available | Haemoglobinuria assessment                             | Anaemia definition                      | Adverse event elicitation method            |
|-------------------------------------|-----------------------|------------------------------------------------------------|--------------------------------------------|---------------------|------------------------------------------------------|-----------------------------------------|-----------------------|--------------------------------------------------------|-----------------------------------------|---------------------------------------------|
| Hasugian-2007 <sup>15</sup>         | Hct <15%              | FST                                                        | ≥30% activity                              | Yes                 | 0, 1, 2, 7, 14                                       | 0, 7                                    | No                    |                                                        |                                         |                                             |
| Leslie-2008 <sup>16</sup>           | Hb <7 g/dL            | Colorimetric test                                          | All activities                             | Yes                 | -                                                    | 0, 7, 14                                | No                    |                                                        |                                         |                                             |
| Abdallah-2012 <sup>28</sup>         | Not stated            | No                                                         | All activities                             | No                  | 0                                                    | -                                       | No                    |                                                        |                                         |                                             |
| Barber-2013 <sup>29</sup>           | No exclusions         | FST                                                        | ≥30% activity                              | Yes                 | 0                                                    | 0, 1, 2, 3                              | No                    |                                                        |                                         |                                             |
| Pasaribu-2013 <sup>17</sup>         | Hb <5 g/dL            | Only in patients with haemolysis at study end              | All activities                             | No                  | 0, variable                                          | 0, 2                                    | No                    |                                                        |                                         |                                             |
| Marques-2014 <sup>30</sup>          | No exclusions         | Not stated                                                 | Unknown                                    | No                  | -                                                    | 0, 3, 7, 14                             | No                    |                                                        |                                         |                                             |
| Gomes-2015 <sup>31</sup>            | Not stated            | Not stated                                                 | Unknown                                    | No                  | -                                                    | 0                                       | No                    |                                                        |                                         |                                             |
| Gonzalez-Ceron-2015 <sup>18</sup>   | Hb <5 g/dL            | No                                                         | All activities                             | No                  | 0, 2, 3, 7                                           | -                                       | No                    |                                                        |                                         |                                             |
| Thanh-2015 <sup>32</sup>            | Not stated            | No                                                         | All activities                             | No                  | 0, 1, 2, 3, 7, 14                                    | 0, 14                                   | No                    |                                                        |                                         |                                             |
| Yuan-2015 <sup>33</sup>             | Not stated            | No                                                         | All activities                             | No                  | -                                                    | -                                       | No                    |                                                        |                                         |                                             |
| Ley-2016 <sup>34</sup>              | Hb <8 g/dL            | Spectrophotometry                                          | All activities (if deficient not given PQ) | Yes                 | -                                                    | 0, 2, 9                                 | No                    |                                                        |                                         |                                             |
| Longley-2016 <sup>35</sup>          | Not stated            | Yes; type not stated                                       | ≥30% activity                              | Yes                 | -                                                    | -                                       | Yes                   |                                                        |                                         |                                             |
| Zuluaga-Idarraga-2016 <sup>36</sup> | Hb <5 g/dL            | No                                                         | All activities                             | No                  | 0, 1, 2, 3, 7, 13                                    | -                                       | No                    |                                                        |                                         |                                             |
| Abreha-2017 <sup>19</sup>           | Hb <8 g/dL            | FST                                                        | ≥30% activity                              | Yes                 | 0, 1, 2, 3, 7, 14                                    | 0, 3, 7, 14                             | No                    | Routine question re colour of urine                    | Hb <8 g/dL                              | Solicited and unsolicited                   |
| Awab-2017 <sup>20</sup>             | Hb <8 g/dL            | FST                                                        | ≥30% activity                              | Yes                 | 0, 1, 2, 7                                           | 0, 1, 2, 7, 14                          | No                    | Patient informed to report dark urine                  | Hb <8 g/dL                              | Checklists and open question                |
| Brasil-2018 <sup>37</sup>           | Not stated            | Not stated                                                 | Unknown                                    | No                  | -                                                    | -                                       | Yes                   |                                                        |                                         |                                             |
| Chu-2018 <sup>21</sup>              | Hct <25%              | FST                                                        | All activities (if deficient not given PQ) | Yes                 | -                                                    | 0                                       | No                    | Not done                                               | Haematocrit <30% (<33% if <2 years old) | Observed or reported                        |
| Grigg-2018 <sup>38</sup>            | Hb <5 g/dL            | FST                                                        | All activities (if deficient not given PQ) | Yes                 | -                                                    | 0, 1, 2, 7, 14                          | No                    |                                                        |                                         |                                             |
| Hamid-2018 <sup>22</sup>            | Hb <8 g/dL            | At 1 of 2 sites; Spectrophotometry & Biosensor (AccessBio) | ≥30% activity                              | Yes                 | -                                                    | 0, 1, 2, 7, 14                          | No                    | Routine question on colour of urine (very dark or not) | Hb <10 g/dL                             | Checklist                                   |
| Chu-2019 <sup>23</sup>              | Hct <25%              | FST                                                        | ≥30% activity                              | Yes                 | -                                                    | 0, 1, 2, 3, 4, 5, 6, 7, 14              | No                    | Not done                                               | Haematocrit <30%                        | Observed or reported                        |
| de Sena-2019 <sup>39</sup>          | Hb <5 g/dL            | Not stated                                                 | Unknown                                    | No                  | -                                                    | 0                                       | No                    |                                                        |                                         |                                             |
| Ladeia-Andrade-2019 <sup>24</sup>   | Hb <8 g/dL            | BinaxNow RDT                                               | ≥30% activity                              | Yes                 | 0, 1, 2, 3, 7, 14                                    | 0, 1, 2, 3, 7, 14                       | Yes                   |                                                        |                                         |                                             |
| Rijal-2019 <sup>25</sup>            | Not stated            | Carestart RDT                                              | ≥30% activity                              | Yes                 | 0                                                    | 0, 1, 3, 7                              | No                    |                                                        |                                         |                                             |
| Taylor-2019 <sup>26</sup>           | Hb <9 g/dL            | FST                                                        | ≥30% activity                              | Yes                 | 0, 1, 2, 3, 4, 5, 6, 7, 8, 9, 10, 11, 12, 13         | 0, 3, 7, 13                             | No                    | Hillmen ≥5                                             | Hb <10 g/dL                             | Checklists (Grade 3 or 4 AEs only recorded) |

|                                 |             |                           |                |     |         |                       |    |
|---------------------------------|-------------|---------------------------|----------------|-----|---------|-----------------------|----|
| Xu-2020 <sup>40</sup>           | Not stated  | No                        | All activities | No  | -       | -                     | No |
| Poespoprodjo-2022 <sup>27</sup> | Hb <9 g/dL  | FST                       | ≥30% activity  | Yes | 0, 1, 2 | 0, 2                  | No |
| Karunajeewa-unpublished         | Hb < 5 g/dL | Carestart or BinaxNow RDT | ≥30% activity  | Yes | 0, 1    | 0, 1, 2, 3, 7, 10, 14 | No |



**Table S3. Study sites included in analysis**

| Paper                               | Study site      | Country     | Region       | Lat   | Long   | Year Start | Year End | MAP Incidence rate (per 1000 persons) | Transmission intensity* | Relapse periodicity# |
|-------------------------------------|-----------------|-------------|--------------|-------|--------|------------|----------|---------------------------------------|-------------------------|----------------------|
| Hasugian-2007 <sup>15</sup>         | Timika          | Indonesia   | Asia-Pacific | -4.50 | 136.85 | 2005       | 2005     | 22.61                                 | High                    | High                 |
| Leslie-2008 <sup>16</sup>           | Adizai          | Pakistan    | Asia-Pacific | 33.79 | 71.58  | 2004       | 2006     | 2.48                                  | Moderate                | Low                  |
| Leslie-2008 <sup>16</sup>           | Baghicha        | Pakistan    | Asia-Pacific | 34.23 | 72.16  | 2004       | 2006     | 2.48                                  | Moderate                | Low                  |
| Leslie-2008 <sup>16</sup>           | Khagan          | Pakistan    | Asia-Pacific | 34.54 | 73.32  | 2004       | 2006     | 2.48                                  | Moderate                | Low                  |
| Abdallah-2012 <sup>28</sup>         | Kassala         | Sudan       | Africa       | 15.41 | 36.42  | 2011       | 2011     | 6.35                                  | Moderate                | Low                  |
| Barber-2013 <sup>29</sup>           | Sabah           | Malaysia    | Asia-Pacific | 5.98  | 116.08 | 2011       | 2011     | 0.21                                  | Low                     | High                 |
| Pasaribu-2013 <sup>17</sup>         | Tanjung Leidong | Indonesia   | Asia-Pacific | 2.77  | 99.98  | 2011       | 2011     | 2.75                                  | Moderate                | High                 |
| Marques-2014 <sup>30</sup>          | Manaus          | Brazil      | Americas     | -3.11 | -60.03 | 2007       | 2008     | 73.17                                 | High                    | Low                  |
| Gomes-2015 <sup>31</sup>            | Oiapoque-AP     | Brazil      | Americas     | 3.84  | -51.83 | 2011       | 2011     | 37.70                                 | High                    | Low                  |
| Gonzalez-Ceron-2015 <sup>18</sup>   | Huehuetan       | Mexico      | Americas     | 15.06 | -92.33 | 2008       | 2009     | 0.55                                  | Low                     | Low                  |
| Gonzalez-Ceron-2015 <sup>18</sup>   | Tuxtla Chico    | Mexico      | Americas     | 14.91 | -92.15 | 2008       | 2009     | 0.55                                  | Low                     | Low                  |
| Gonzalez-Ceron-2015 <sup>18</sup>   | Fr Hidalgo      | Mexico      | Americas     | 14.78 | -92.18 | 2008       | 2009     | 0.55                                  | Low                     | Low                  |
| Gonzalez-Ceron-2015 <sup>18</sup>   | Cacahoatan      | Mexico      | Americas     | 15.09 | -92.21 | 2008       | 2009     | 0.55                                  | Low                     | Low                  |
| Gonzalez-Ceron-2015 <sup>18</sup>   | Tapachula       | Mexico      | Americas     | 14.91 | -92.26 | 2008       | 2009     | 0.55                                  | Low                     | Low                  |
| Thanh-2015 <sup>32</sup>            | Tra Leng        | Vietnam     | Asia-Pacific | 24.75 | 97.55  | 2009       | 2011     | 0.15                                  | Low                     | High                 |
| Yuan-2015 <sup>33</sup>             | Laiza           | Myanmar     | Asia-Pacific | 24.75 | 97.55  | 2013       | 2013     | 9.41                                  | Moderate                | High                 |
| Ley-2016 <sup>34</sup>              | Alikadam        | Bangladesh  | Asia-Pacific | 21.65 | 92.31  | 2014       | 2015     | 0.59                                  | Low                     | High                 |
| Longley-2016 <sup>35</sup>          | Tha Song Yang   | Thailand    | Asia-Pacific | 17.57 | 97.92  | 2014       | 2014     | 3.09                                  | Moderate                | High                 |
| Zuluaga-Idarraga-2016 <sup>36</sup> | Turbo           | Colombia    | Americas     | 8.10  | -76.73 | 2012       | 2012     | 5.08                                  | Moderate                | Low                  |
| Abreha-2017 <sup>19</sup>           | Batu            | Ethiopia    | Africa       | 6.67  | 39.42  | 2013       | 2013     | 85.49                                 | High                    | Low                  |
| Abreha-2017 <sup>19</sup>           | Bishoftu        | Ethiopia    | Africa       | 8.73  | 39.01  | 2013       | 2013     | 85.49                                 | High                    | Low                  |
| Awab-2017 <sup>20</sup>             | Jalalabad       | Afghanistan | Asia-Pacific | 34.43 | 70.46  | 2009       | 2014     | 40.12                                 | High                    | Low                  |
| Brasil-2018 <sup>37</sup>           | Manaus          | Brazil      | Americas     | -3.11 | -60.02 | 2012       | 2014     | 35.04                                 | High                    | Low                  |
| Chu-2018 <sup>21</sup>              | Mae Sot         | Thailand    | Asia-Pacific | 16.72 | 98.58  | 2010       | 2010     | 2.15                                  | Moderate                | High                 |
| Grigg-2018 <sup>38</sup>            | Kudat           | Malaysia    | Asia-Pacific | 6.89  | 116.85 | 2014       | 2014     | 0.11                                  | Low                     | High                 |
| Hamid-2018 <sup>22</sup>            | Khartoum        | Sudan       | Africa       | 15.51 | 32.54  | 2015       | 2016     | 6.78                                  | Moderate                | Low                  |
| Hamid-2018 <sup>22</sup>            | New Halfa       | Sudan       | Africa       | 15.33 | 35.60  | 2015       | 2016     | 2.70                                  | Moderate                | Low                  |
| Chu-2019 <sup>23</sup>              | Mae Sot         | Thailand    | Asia-Pacific | 16.72 | 98.58  | 2014       | 2014     | 3.09                                  | Moderate                | High                 |
| de Sena-2019 <sup>39</sup>          | Marajo Island   | Brazil      | Americas     | -0.94 | -49.64 | 2016       | 2017     | 5.89                                  | Moderate                | Low                  |
| Ladeia-Andrade-2019 <sup>24</sup>   | Mancio Lima     | Brazil      | Americas     | -7.61 | -72.91 | 2014       | 2014     | 47.40                                 | High                    | Low                  |
| Rijal-2019 <sup>25</sup>            | Jhapa           | Nepal       | Asia-Pacific | 26.55 | 87.89  | 2016       | 2016     | 0.12                                  | Low                     | High                 |
| Rijal-2019 <sup>25</sup>            | Kailali         | Nepal       | Asia-Pacific | 28.83 | 80.90  | 2016       | 2016     | 0.22                                  | Low                     | High                 |
| Taylor-2019 <sup>26</sup>           | Krong Pa        | Vietnam     | Asia-Pacific | 13.22 | 108.67 | 2015       | 2017     | 0.18                                  | Low                     | High                 |
| Taylor-2019 <sup>26</sup>           | Dak O           | Vietnam     | Asia-Pacific | 12.00 | 107.50 | 2015       | 2017     | 0.24                                  | Low                     | High                 |
| Taylor-2019 <sup>26</sup>           | Bu Gia Map      | Vietnam     | Asia-Pacific | 12.04 | 107.05 | 2015       | 2017     | 0.24                                  | Low                     | High                 |
| Taylor-2019 <sup>26</sup>           | Hanura          | Indonesia   | Asia-Pacific | -5.53 | 105.24 | 2015       | 2017     | 1.01                                  | Moderate                | High                 |
| Taylor-2019 <sup>26</sup>           | Tanjung Leidong | Indonesia   | Asia-Pacific | 2.77  | 99.98  | 2015       | 2017     | 1.03                                  | Moderate                | High                 |

|                                 |            |             |              |        |        |      |      |        |          |      |
|---------------------------------|------------|-------------|--------------|--------|--------|------|------|--------|----------|------|
| Taylor-2019 <sup>26</sup>       | Arba Minch | Ethiopia    | Africa       | 6.01   | 37.54  | 2015 | 2017 | 17.80  | High     | Low  |
| Taylor-2019 <sup>26</sup>       | Laghman    | Afghanistan | Asia-Pacific | 34.70  | 70.15  | 2015 | 2017 | 97.70  | High     | Low  |
| Taylor-2019 <sup>26</sup>       | Metahara   | Ethiopia    | Africa       | 8.90   | 39.92  | 2015 | 2017 | 26.02  | High     | Low  |
| Taylor-2019 <sup>26</sup>       | Jalalabad  | Afghanistan | Asia-Pacific | 34.43  | 70.46  | 2015 | 2017 | 116.49 | High     | Low  |
| Xu-2020 <sup>40</sup>           | Laiza      | Myanmar     | Asia-Pacific | 24.75  | 97.55  | 2014 | 2016 | 6.67   | Moderate | High |
| Poespoprodjo-2022 <sup>27</sup> | Papua      | Indonesia   | Asia-Pacific | -4.24  | 136.82 | 2016 | 2018 | 18.40  | High     | High |
| Karunajeewa-unpublished         | Nambauk    | Vanuatu     | Asia-Pacific | -15.45 | 167.08 | 2013 | 2013 | 24.58  | High     | High |
| Karunajeewa- unpublished        | Port Olry  | Vanuatu     | Asia-Pacific | -15.04 | 167.07 | 2013 | 2013 | 24.58  | High     | High |
| Karunajeewa- unpublished        | Luganville | Vanuatu     | Asia-Pacific | -15.51 | 167.20 | 2013 | 2013 | 24.58  | High     | High |

Lat – latitude; Long – longitude; MAP – malaria Atlas Project; \*Transmission intensity is classified as low (an incidence rate of <1 per 1000 persons), moderate (1 to <10 per 1000 persons), high ( $\geq 10$  per 1000 persons); # High relapse periodicity <47 days.

**Table S4. Reasons for studies not being included in analyses**

| <b>Reason</b>                                      | <b>Number of studies</b> | <b>Studies</b> |
|----------------------------------------------------|--------------------------|----------------|
| Data not available by 30 June 2022                 | 9                        | 45,53-64       |
| Investigators unable to be contacted               | 2                        | 65,66          |
| Missing minimum data for inclusion                 | 2                        | 67,68          |
| Initial investigator response but no data provided | 4                        | 69-72          |
| No response from investigators                     | 21                       | 73-93          |

**Table S5. Studies eligible for the analyses but not included**

| First Author                          | Treatment groups | Region       | Country   | Follow up (days) | Randomised | Recruitment period | Treatment groups                                                                                       | Pv patients enrolled | Treated with PQ | Female (%)    | Mean Age (SD) | Median Age (range) | Reasons for exclusion | Eligibility |            |      |                |
|---------------------------------------|------------------|--------------|-----------|------------------|------------|--------------------|--------------------------------------------------------------------------------------------------------|----------------------|-----------------|---------------|---------------|--------------------|-----------------------|-------------|------------|------|----------------|
|                                       |                  |              |           |                  |            |                    |                                                                                                        |                      |                 |               |               |                    |                       | Efficacy    | GI tol     | Haem | Adverse events |
| Villalobos-Salcedo-2000 <sup>65</sup> | 2                | Americas     | Brazil    | 28               | Yes        | 1998               | Cq_Pq_3.5_14d_D3; Cq_Pq_2.5_5d_D0                                                                      | 79                   | 79              | 21.5          | 31.7 (-)      |                    | Unable to contact     | No          | No         | No   | Not stated     |
| Abdon-2001 <sup>73</sup>              | 3                | Americas     | Brazil    | 180              | Yes        | 1994-1995          | Cq_Pq_3.5_14d_D0; Cq_Pq_3.5_7d_D0; Cq_Pq_2.5_5d_D0                                                     | 120                  | 120             | 37.5          | 27.3 (-)      |                    | No response           | Yes         | No         | No   | Not stated     |
| Buchachart-2001 <sup>74</sup>         | 1                | Asia-Pacific | Thailand  | 28               | No         | 1992-1997          | Cq_Pq_3.5_14d_D3                                                                                       | 593                  | 593             | 37.1          | 25.1 (-)      |                    | No response           | No          | No         | No   | Yes            |
| Solari Soto-2002 <sup>75</sup>        | 2                | Americas     | Peru      | 60               | Yes        | 1998-1999          | Cq_Pq_3.5_7d_D2; Cq_Pq_3.5_14d_D2                                                                      | 60                   | 60              | 43.3          | 26.45 (16.96) |                    | No response           | Yes         | Yes        | No   | Yes            |
| Yadav-2002 <sup>76</sup>              | 2                | Asia-Pacific | India     | 365              | Yes        | 1988-1991          | Cq; Cq_Pq_1.25_5d_D2                                                                                   | 1482                 | 759             | Not stated    | Not stated    |                    | No response           | Yes         | No         | No   | Not stated     |
| Pinto-2003 <sup>77</sup>              | 2                | Americas     | Brazil    | 28               | Yes        | 1997-1998          | Cq_Pq_3.0_14d_D0; Cq_Pq_3.0_14d_D0                                                                     | 132                  | 132             | 37.9          | 30.7 (-)      |                    | No response           | No          | Not stated | No   | Yes            |
| Leslie-2004 <sup>67</sup>             | 3                | Asia-Pacific | Pakistan  | 270              | Yes        | 2000-2001          | Cq; Cq_Pq_3.5_14d_D0; Cq_Pq_3.5_14d_D0                                                                 | 595                  | 383             | 50.8          | 12.9 (-)      |                    | Missing minimum data  | Yes         | No         | No   | Yes            |
| Maguire-2006 <sup>78</sup>            | 2                | Asia-Pacific | Indonesia | 28               | Yes        | 1996-1999          | Cq_Pq_3.5_14d_D0; Mf_Pq_3.5_14d_D0                                                                     | 243                  | 243             | 35.2          | 22.6 (-)      |                    | No response           | No          | Not stated | No   | Not stated     |
| Krudsood-2008 <sup>79</sup>           | 6                | Asia-Pacific | Thailand  | 28               | Yes        | Not stated         | As_Pq_2.5_5d_D5; As_Pq_3.5_7d_D5; As_Pq_4.5_9d_D5; As_Pq_5.5_11d_D5; As_Pq_7.0_7d_D5; As_Pq_7.0_7d_D5; | 399                  | 399             | 35.1          | 24.2 (-)      |                    | No response           | No          | No         | No   | Yes            |
| Carmona-Fonseca-2009 <sup>53</sup>    | 4                | Americas     | Colombia  | 120              | Yes        | 2001-2003          | Cq_Pq_3.5_14d_D1; Cq_Pq_1.75_3d_D1; Cq_Pq_2.5_3d_D1; Cq_Pq_3.5_3d_D1                                   | 188                  | 188             | 30.4          | Not stated    |                    | Data not available    | Yes         | No         | No   | Not stated     |
| Nateghpour-2009 <sup>80</sup>         | 1                | Asia-Pacific | Iran      | 28               | No         | Not stated         | Cq_Pq_6.0_8w_D3                                                                                        | Not available        | Not available   | Not available | Not available |                    | No response           | No          | No         | No   | Not stated     |
| Orjuela-Sanchez-2009 <sup>68</sup>    | 2                | Americas     | Brazil    | 336              | No         | 2004-2007          | Cq_Pq_3.5_7d_D0; Cq_Pq_3.5_7d_D0                                                                       | 164                  | 164             | Not stated    | Not stated    |                    | Missing minimum data  | Yes         | No         | No   | Not stated     |
| Carmona-Fonseca-2010 <sup>54</sup>    | 2                | Americas     | Colombia  | 120              | Yes        | 2005-2008          | Cq_Pq_3.5_7d_D1; Cq_Pq_3.5_3d_D1                                                                       | 79                   | 79              | Not stated    | Not stated    |                    | Data not available    | Yes         | Yes        | No   | Yes            |
| Takeuchi-2010 <sup>81</sup>           | 2                | Asia-Pacific | Thailand  | 90               | Yes        | 2007-2009          | Cq_Pq_3.5_14d_D3; Cq_Pq_3.5_14d_D3                                                                     | 216                  | 216             | 39.8          | Not stated    |                    | No response           | Yes         | No         | No   | Yes            |
| Maneeboonyang-2011 <sup>82</sup>      | 2                | Asia-Pacific | Thailand  | 90               | Yes        | 2005-2006          | Cq_Pq_3.5_14d_D3; Cq_Pq_3.5_14d_D3                                                                     | 92                   | 92              | 40            | Not stated    |                    | No response           | Yes         | No         | No   | Not stated     |
| Van Den Eede-2011 <sup>69</sup>       | 1                | Americas     | Peru      | 365              | No         | 2008               | Cq_Pq_3.5_7d_D0                                                                                        | 51                   | 51              | 49            | Not stated    | 15 (2-80)          | Data not provided     | Yes         | Yes        | No   | Yes            |
| Eibach-2012 <sup>66</sup>             | 1                | Americas     | Guyana    | 28               | No         | 2009-2010          | Al_Pq_3.5_14d_D0                                                                                       | 74                   | 74              | 9.5           | Not stated    | 24 (5-57)          | Unable to contact     | No          | No         | No   | Not stated     |
| Graf-2012 <sup>83</sup>               | 3                | Americas     | Peru      | 210              | Yes        | 2005-2008          | Cq_Pq_2.5_5d_D0; Cq_Pq_3.5_7d_D0; Cq_Pq_3.5_14d_D0                                                     | 540                  | 540             | Not stated    | Not stated    |                    | No response           | Yes         | No         | No   | Not stated     |
| Pedro-2012 <sup>84</sup>              | 1                | Americas     | Brazil    | 28               | No         | 2005-2011          | Cq_Pq_3.5_Xd_D0                                                                                        | 47                   | 47              | 24.5          | Not stated    |                    | No response           | No          | No         | No   | Yes            |
| Ganguly-2013 <sup>85</sup>            | 2                | Asia-Pacific | India     | 42               | Yes        | 2011-2012          | Cq; Cq_Pq_3.5_14d_D0                                                                                   | 250                  | 125             | 10.8          | 25.2 (-)      |                    | No response           | Yes         | Yes        | Yes  | Yes            |
| Liu-2013 <sup>86</sup>                | 2                | Asia-Pacific | China     | 365              | Yes        | 2009-2010          | Cq_Pq_4.0_8d_D0; Anq                                                                                   | 260                  | 128             | 14            | Not stated    |                    | No response           | Yes         | Yes        | Yes  | Yes            |
| Miahipour-2013 <sup>87</sup>          | 2                | Asia-Pacific | Iran      | 540              | No         | 2008-2011          | Cq; Cq_Pq_6.0_8w_D3                                                                                    | 163                  | 163             | 23.3          | Not stated    |                    | No response           | Yes         | No         | No   | Not stated     |
| Zhu-2013 <sup>88</sup>                | 1                | Asia-Pacific | China     | 28               | No         | 2008-2009          | Cq_Pq_4.0_8d_D3                                                                                        | 39                   | 39              | 42.1          | 43 (-)        |                    | No response           | No          | No         | No   | Yes            |
| Delgado-Ratto-2014 <sup>89</sup>      | 1                | Americas     | Peru      | 720              | No         | 2008               | Cq_Pq_3.5_7d_D0                                                                                        | 37                   | 37              | 48.6          | Not stated    | 15                 | No response           | Yes         | Yes        | No   | Yes            |

|                                          |   |              |           |     |     |           |                                                            |     |     |            |             |               |                                     |     |     |     |            |
|------------------------------------------|---|--------------|-----------|-----|-----|-----------|------------------------------------------------------------|-----|-----|------------|-------------|---------------|-------------------------------------|-----|-----|-----|------------|
| Kheng-2015 <sup>55</sup>                 | 1 | Asia-Pacific | Cambodia  | 56  | No  | 2013-2014 | Dp_Pq_6.0_8w_D0                                            | 75  | 75  | 16         | Not stated  | 24 (5-63)     | Data not available                  | Yes | No  | No  | Yes        |
| Negreiros-2016 <sup>71</sup>             | 1 | Americas     | Brazil    | 168 | No  | 2014      | Cq_Pq_3.5_7d_D0                                            | 119 | 119 | 45.4       | Not stated  | 23.4 (5-67.3) | Data not provided                   | Yes | Yes | No  | Yes        |
| Valecha-2016 <sup>56</sup>               | 2 | Asia-Pacific | India     | 42  | Yes | 2011-2013 | Cq_Pq_3.5_14d_D3;<br>ArtemPip_Pq_3.5_14d_D3                | 317 | 317 | 8.2        | 33.7 (13.5) |               | Data not available                  | Yes | No  | No  | Yes        |
| Mac Donald-Ottevanger-2017 <sup>90</sup> | 2 | Americas     | Suriname  | 365 | Yes | 2006-2008 | Cq_Pq_3.5_7d_D3;<br>Cq_Pq_3.5_14d_D3                       | 79  | 79  | 34.4       |             | 24.64 (-)     | No response                         | Yes | No  | No  | Not stated |
| Dharmawardena-2017 <sup>57</sup>         | 1 | Asia-Pacific | Sri Lanka | 365 | No  | 2015-2016 | Cq_Pq_3.5_14d_D2                                           | 32  | 32  | 6.8        |             | 35.5 (13-66)  | Data not available                  | Yes | No  | No  | Not stated |
| Azarian Moghadam-2018 <sup>91</sup>      | 1 | Asia-Pacific | Iran      | 28  | No  | 2013-2015 | Dp_Pq_6.0_8w_D2                                            | 170 | 170 | 35.3       | Not stated  |               | No response                         | No  | No  | No  | Not stated |
| Pham-2019 <sup>72</sup>                  | 1 | Asia-Pacific | Vietnam   | 730 | No  | 2009-2011 | Cq_Pq_5.0_10d_D0                                           | 260 | 260 | 39         | Not stated  |               | Data not provided                   | Yes | No  | No  | Not stated |
| Han-2020 <sup>92</sup>                   | 1 | Asia-Pacific | Myanmar   | 28  | No  | 2017-2019 | AsPy_Pq_3.5_14d_D0                                         | 206 | 206 | 35         | 27.2        |               | No response                         | No  | No  | No  | Yes        |
| Shaikh-2021 <sup>93</sup>                | 1 | Asia-Pacific | Pakistan  | 56  | No  | 2018-2019 | Al_Pq_6.0_8w_D0                                            | 40  | 40  | 0          | Not stated  |               | No response                         | Yes | No  | No  | Yes        |
| Arcelia-2023 <sup>60</sup>               | 1 | Asia-Pacific | Indonesia | 28  | No  | 2019-2020 | Dp_Pq_3.5_14d_D0                                           | 60  | 60  | Not stated | Not stated  |               | Data not available by June 30, 2022 | No  | Yes | No  | Yes        |
| Mekonnen-2023 <sup>58</sup>              | 1 | Africa       | Ethiopia  | 42  | No  | 2019-2020 | Cq_Pq_3.5_14d_D0                                           | 102 | 102 | 50         | Not stated  | 13.5          | Data not available by June 30, 2022 | Yes | Yes | Yes | Yes        |
| Moore-2023 <sup>59</sup>                 | 3 | Asia-Pacific | PNG       | 63  | Yes | 2013-2018 | Al_Pq_7.0_14d_D0;<br>Al_Pq_7.0_7d_D0;<br>Al_Pq_7.0_3.5d_D0 | 73  | 73  | 40         | Not stated  | 6.6           | Data not available by June 30, 2022 | Yes | No  | Yes | Yes        |
| Woon-2023 <sup>45</sup>                  | 2 | Asia-Pacific | PNG       | 84  | Yes | 2018-2019 | Al_Pq_7.0_3.5d_D3;<br>Al_Pq_7.0_3.5d_D24                   | 219 | 219 | 41         | Not stated  | 6.6           | Data not available by June 30, 2022 | Yes | No  | No  | Yes        |
| Malla-2023 <sup>61</sup>                 | 1 | Asia-Pacific | Myanmar   | 365 | No  | 2012-2013 | Cq_Pq_3.5_14d_D0                                           | 556 | 556 | Not stated | 10.7 (-)    |               | Data not available by June 30, 2022 | Yes | No  | No  | No         |
| Liu-2024 <sup>62</sup>                   | 2 | Asia-Pacific | Myanmar   | 365 | Yes | 2017-2020 | Anq_Pq_3.5_14d_D0;<br>Anq_Pq_0.9_3.5d_D0;                  | 307 | 307 | 43.4       | Not stated  | 19 (-)        | Data not available by June 30, 2022 | Yes | No  | No  | Yes        |
| Gebrie-2024 <sup>63</sup>                | 1 | Africa       | Ethiopia  | 42  | No  | 2022-2023 | Cq_Pq_3.5_14d_D0                                           | 100 | 100 | 38         | 12 (-)      |               | Data not available by June 30, 2022 | Yes | Yes | Yes | Yes        |
| Manh-2024 <sup>64</sup>                  | 1 | Asia-Pacific | Vietnam   | 42  | No  | 2018-2019 | AsPy_Pq_3.5_14d_D0                                         | 59  | 59  | 11.9       | 36.2 (-)    |               | Data not available by June 30, 2022 | Yes | No  | Yes | Yes        |

Al – artemether-lumefantrine; Anq – artemisinin-naphthoquine; Artm – arterolane maleate; As – artesunate; Bq – bulaquine; Cq – chloroquine; Dp – dihydroartemisinin-piperaquine; Mf – mefloquine; Pip – piperaquine; PQ/Pq – primaquine; Pv – *P. vivax*; Py – pyronaridine; SD – standard deviation; Tnd – tinidazole; Tq – tafenoquine; \*Treatment code describes (schizontocidal drug)\_(hypnozoitocidal drug)\_(total primaquine dose)\_(duration of primaquine treatment eg 14d = 14 days)\_(primaquine start day)

**Figure S2. Location of study sites for included studies**

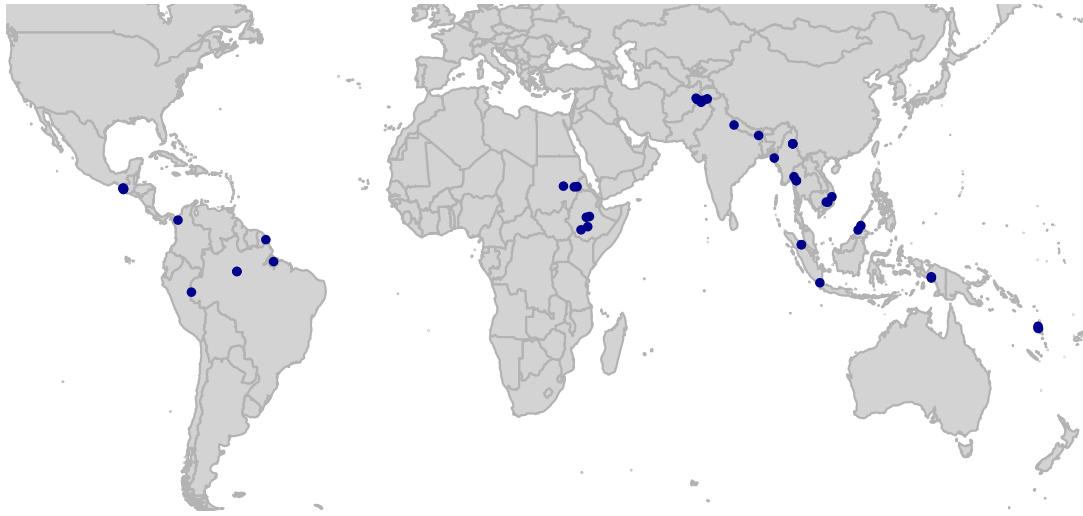

**Table S6. Risk of bias assessment in randomised controlled studies**

| Author-year                       | Bias from randomisation | Bias due to deviation from intervention | Bias from missing outcome |             |              |        | Bias in measurement of the outcome |             |              | Bias in selection of the reported results | Overall bias | Balanced age groups | Follow up to 180 days | Comparison of no PQ to PQ |
|-----------------------------------|-------------------------|-----------------------------------------|---------------------------|-------------|--------------|--------|------------------------------------|-------------|--------------|-------------------------------------------|--------------|---------------------|-----------------------|---------------------------|
|                                   |                         |                                         | Efficacy                  | Haematology | Tolerability | AES    | Efficacy                           | Haematology | Tolerability |                                           |              |                     |                       |                           |
| Hasugian-2007 <sup>15</sup>       | Green                   | Green                                   | Orange                    | Green       | Green        | Grey   | Green                              | Green       | Orange       | Grey                                      | Yellow       | Green               | Red                   | Red                       |
| Leslie-2008 <sup>16</sup>         | Orange                  | Green                                   | Green                     | Green       | Grey         | Grey   | Green                              | Green       | Grey         | Grey                                      | Yellow       | Red                 | Grey                  | Green                     |
| Pasaribu-2013 <sup>17</sup>       | Green                   | Green                                   | Orange                    | Green       | Orange       | Grey   | Green                              | Green       | Orange       | Grey                                      | Yellow       | Red                 | Green                 | Red                       |
| Gonzalez-Ceron-2015 <sup>18</sup> | Red                     | *                                       | Orange                    | Grey        | Green        | Grey   | Green                              | Green       | Orange       | Grey                                      | Yellow       | Red                 | Green                 | Red                       |
| Abreha-2017 <sup>19</sup>         | Green                   | Green                                   | Orange                    | Green       | Green        | Grey   | Green                              | Green       | Orange       | Grey                                      | Yellow       | Red                 | Green                 | Green                     |
| Awab-2017 <sup>20</sup>           | Green                   | Green                                   | Orange                    | Green       | Green        | Grey   | Green                              | Green       | Orange       | Grey                                      | Yellow       | Red                 | Green                 | Green                     |
| Chu-2018 <sup>21</sup>            | Green                   | Green                                   | Orange                    | Green       | Grey         | Grey   | Green                              | Green       | Orange       | Grey                                      | Yellow       | Red                 | Green                 | Green                     |
| Hamid-2018 <sup>22</sup>          | Green                   | Green                                   | Orange                    | Green       | Green        | Grey   | Green                              | Green       | Orange       | Grey                                      | Yellow       | Red                 | Red                   | Green                     |
| Chu-2019 <sup>23</sup>            | Green                   | *                                       | Orange                    | Grey        | Green        | Grey   | Green                              | Green       | Orange       | Green                                     | Yellow       | Red                 | Green                 | Red                       |
| Ladeia-Andrade-2019 <sup>24</sup> | Green                   | Green                                   | Orange                    | Green       | Green        | Grey   | Green                              | Green       | Orange       | Grey                                      | Yellow       | Red                 | Green                 | Red                       |
| Rijal-2019 <sup>25</sup>          | Green                   | *                                       | Orange                    | Green       | Green        | Grey   | Green                              | Green       | Orange       | Grey                                      | Yellow       | Red                 | Green                 | Green                     |
| Taylor-2019 <sup>26</sup>         | Green                   | Green                                   | Green                     | Green       | Green        | Orange | Green                              | Green       | Green        | Green                                     | Yellow       | Red                 | Green                 | Green                     |
| Poespoprodjo-2022 <sup>27</sup>   | Green                   | Green                                   | Green                     | Green       | Green        | Grey   | Green                              | Green       | Orange       | Grey                                      | Yellow       | Green               | Green                 | Green                     |
| Karunajeewa-unpublished           | Green                   | Green                                   | Green                     | Green       | Green        | Grey   | Green                              | Green       | Orange       | Grey                                      | Yellow       | Green               | Red                   | Green                     |

Green – low risk of bias; Red – high risk of bias; Orange – unclear risk of bias; Grey – not applicable; Assessed according to the Cochrane Risk of Bias 2 tool<sup>12</sup> for randomised controlled trials, using the entire study population (children and adults); \* Studies analysed per protocol but all data available for these meta-analyses; AEs – adverse events; PQ – primaquine.

**Table S7. Risk of bias assessment in single arm observational studies**

| Author-year                         | Clear criteria for inclusion | Condition measured in reliable way | Valid methods for condition | Consecutive inclusion | Complete inclusion | Demographics reported | Clinical information reported | Outcomes reported | Site description | Analysis appropriate | Balanced age groups | Follow up to 180 days | Comparison of no PQ to PQ |
|-------------------------------------|------------------------------|------------------------------------|-----------------------------|-----------------------|--------------------|-----------------------|-------------------------------|-------------------|------------------|----------------------|---------------------|-----------------------|---------------------------|
| Abdallah-2012 <sup>28</sup>         | Green                        | Green                              | Green                       | Green                 | Green              | Green                 | Green                         | Green             | Green            | Green                | Red                 | Grey                  | Grey                      |
| Barber-2013 <sup>29</sup>           | Green                        | Green                              | Green                       | Green                 | Green              | Green                 | Green                         | Green             | Green            | Green                | Red                 | Red                   | Grey                      |
| Marques-2014 <sup>30</sup>          | Green                        | Green                              | Green                       | Red                   | Grey               | Green                 | Green                         | Green             | Green            | Green                | Red                 | Grey                  | Grey                      |
| Gomes-2015 <sup>31</sup>            | Green                        | Green                              | Green                       | Green                 | Green              | Green                 | Green                         | Green             | Green            | Green                | Red                 | Grey                  | Grey                      |
| Thanh-2015 <sup>32</sup>            | Green                        | Green                              | Green                       | Green                 | Green              | Green                 | Green                         | Green             | Green            | Green                | Green               | Grey                  | Grey                      |
| Yuan-2015 <sup>33</sup>             | Green                        | Green                              | Green                       | Green                 | Green              | Green                 | Green                         | Green             | Green            | Green                | Red                 | Red                   | Grey                      |
| Ley-2016 <sup>34</sup>              | Green                        | Green                              | Green                       | Green                 | Green              | Green                 | Green                         | Green             | Green            | Green                | Red                 | Grey                  | Grey                      |
| Longley-2016 <sup>35</sup>          | Green                        | Green                              | Green                       | Green                 | Green              | Green                 | Green                         | Green             | Green            | Green                | Red                 | Green                 | Grey                      |
| Zuluaga-Idarraga-2016 <sup>36</sup> | Green                        | Green                              | Green                       | Green                 | Green              | Green                 | Green                         | Green             | Green            | Green                | Red                 | Green                 | Grey                      |
| Brasil-2018 <sup>37</sup>           | Green                        | Green                              | Green                       | Green                 | Green              | Green                 | Green                         | Green             | Green            | Green                | Green               | Grey                  | Grey                      |
| Grigg-2018 <sup>38</sup>            | Orange                       | Green                              | Green                       | Orange                | Orange             | Red                   | Red                           | Green             | Green            | Green                | Green               | Red                   | Grey                      |
| de Sena-2019 <sup>39</sup>          | Green                        | Green                              | Green                       | Green                 | Green              | Green                 | Green                         | Green             | Green            | Green                | Red                 | Red                   | Grey                      |
| Xu-2020 <sup>40</sup>               | Green                        | Green                              | Green                       | Green                 | Green              | Green                 | Green                         | Green             | Green            | Green                | Red                 | Grey                  | Grey                      |

Green – yes (low risk of bias); Red – no (higher risk of bias); Orange – unclear; Grey – not applicable; Assessed according to the Joanna Briggs Institute Case Series tool<sup>13</sup> for single arm studies, using the entire study population (children and adults); The appropriateness of analysis was considered appropriate for all studies given that the individual patient data were re-analysed as part of these meta-analyses; PQ – primaquine.

Of 21 studies not included in the adverse events analysis, 11 were not explicit about assessing adverse events and did not report any serious adverse events. Of the remaining ten, seven found no serious adverse events among a total of 1714 participants treated with primaquine, with Gonzalez-Ceron 2015 elaborating that ‘some’ patients had light jaundice, but none reported dark urine or any other clinical symptoms of haemolysis. Three studies reported serious adverse events. Hasugian 2007 found two adverse events among 334 participants treated with primaquine, although these were likely experienced prior to primaquine dosing. Both were adults with recurrent vomiting hospitalised on D3 after completion of artesunate plus amodiaquine, and made a full recovery. Pasaribu 2013 found one serious adverse events in 331 participants treated with artesunate or dihydroartemisinin-piperaquine and primaquine at 0.25 mg/kg for 14 days, a pericarditis 10 days after treatment, whereupon primaquine was discontinued and he made a full recovery. Poespoprodjo 2022 found two serious adverse events in 474 participants dosed with primaquine at 15 mg daily for 14 days (0.5mg/kg). One was a 56-year-old with acute falciparum malaria who suffered cerebral complications on day 1 and the other an 11-year-old boy, also with acute falciparum malaria who had intractable vomiting from day 1. Both events were deemed unrelated to primaquine, and the participants recovered.



**Table S8. Comparison of baseline characteristics between included studies and eligible but not included studies**

| <b>Characteristic</b>               | <b>Included studies<br/>(n=27)</b> | <b>Studies eligible but not<br/>included<br/>(n=41)</b> |
|-------------------------------------|------------------------------------|---------------------------------------------------------|
| Region <sup>#</sup>                 |                                    |                                                         |
| Asia-Pacific, studies (%)           | 17.75 (66%)                        | 25 (61%)                                                |
| Africa, studies (%)                 | 2.25 (8%)                          | 2 (5%)                                                  |
| The Americas, studies (%)           | 7 (26%)                            | 14 (4%)                                                 |
| Year of enrolment <sup>†</sup>      |                                    |                                                         |
| Pre-2009, studies (%)               | 3 (11%)                            | 18 (44%)                                                |
| 2009-2017, studies (%)              | 24 (89%)                           | 23 (56%)                                                |
| Follow up duration (days)           |                                    |                                                         |
| 28                                  | 5 (19%)                            | 12 (29%)                                                |
| >28 to 42                           | 5 (19%)                            | 5 (12%)                                                 |
| >42 to <180                         | 2 (7%)                             | 10 (24%)                                                |
| 180                                 | 4 (15%)                            | 1 (2%)                                                  |
| >180                                | 11 (41%)                           | 13 (32%)                                                |
| Age (years), median (IQR)           | 16 (10-28)                         | 23 (11-25) <sup>*§</sup>                                |
| Female, % of patients, median (IQR) | 40                                 | 37 (30-43) <sup>*¶</sup>                                |

IQR – interquartile range; <sup>#</sup> Multinational studies considered as a proportion of the number of study sites; <sup>\*</sup> Age, and female percentage of targeted studies were calculated using frequency weighted mean or median according to number of patients; <sup>†</sup> Year of enrolment defined as the year study enrolment completed; <sup>§</sup> Mean or median age not available from 16 studies; <sup>¶</sup> Percentage not available from 7 studies.

**Table S9. Demographics and baseline characteristics for efficacy analysis by primaquine category**

|                                          | Overall<br>N=2,892         | No PQ<br>N=577              | Very low dose<br>total PQ<br>(<2 mg/kg)<br>N=28 | Low dose total<br>PQ<br>(2 to <5 mg/kg)<br>N=1,043 | High dose total<br>PQ<br>(≥5 mg/kg)<br>N=1,207 | Intermittent PQ<br>N=37    |
|------------------------------------------|----------------------------|-----------------------------|-------------------------------------------------|----------------------------------------------------|------------------------------------------------|----------------------------|
| <b>Sex</b>                               |                            |                             |                                                 |                                                    |                                                |                            |
| Male                                     | 1,615 (55.8%)              | 330 (57.2%)                 | 17 (60.7%)                                      | 594 (57.0%)                                        | 655 (54.3%)                                    | 19 (51.4%)                 |
| Female                                   | 1,277 (44.2%)              | 247 (42.8%)                 | 11 (39.3%)                                      | 449 (43.0%)                                        | 552 (45.7%)                                    | 18 (48.6%)                 |
| <b>Age (years)</b>                       |                            |                             |                                                 |                                                    |                                                |                            |
| Median (IQR)                             | 9.0 (6.0-12.0)             | 8.5 (5.5-11.7)              | 7.7 (5.5-11.5)                                  | 8.0 (5.3-11.0)                                     | 9.0 (6.0-12.0)                                 | 9.0 (6.0-12.1)             |
| 5-<15                                    | 2,354 (81.4%)              | 468 (81.1%)                 | 23 (82.1%)                                      | 845 (81.0%)                                        | 989 (81.9%)                                    | 29 (78.4%)                 |
| 1-<5                                     | 533 (18.4%)                | 107 (18.5%)                 | 5 (17.9%)                                       | 198 (19.0%)                                        | 216 (17.9%)                                    | 7 (18.9%)                  |
| <1                                       | 5 (0.2%)                   | 2 (0.3%)                    | 0 (0.0%)                                        | 0 (0.0%)                                           | 2 (0.2%)                                       | 1 (2.7%)                   |
| <b>Enrolment variables</b>               |                            |                             |                                                 |                                                    |                                                |                            |
| Weight (kg)                              | 23.0 (16.0-32.0)           | 23.0 (16.0-31.0)            | 22.0 (15.6-32.2)                                | 24.0 (15.0-34.0)                                   | 22.9 (16.0-31.1)                               | 28.0 (16.0-36.0)           |
| Malnutrition                             | 123/565 (21.8%)            | 34/132 (25.8%)              | 2/7 (28.6%)                                     | 32/160 (20.0%)                                     | 55/258 (21.3%)                                 | 0/8 (0.0%)                 |
| Presence of fever                        | 2,515/2,729<br>(92.2%)     | 553/577 (95.8%)             | 25/28 (89.3%)                                   | 782/880 (88.9%)                                    | 1,121/1,207<br>(92.9%)                         | 34/37 (91.9%)              |
| Parasitaemia,<br>parasites/mL            | 3493.8 (1100.0-<br>8845.0) | 4560.0 (2000.0-<br>10800.0) | 6037.0 (3625.0-<br>8100.0)                      | 2400.0 (750.0-<br>5800.0)                          | 4170.4 (1111.1-<br>11520.0)                    | 5105.5 (2067.3-<br>8413.5) |
| Haemoglobin, g/dL                        | 11.6 (1.5)                 | 11.5 (1.5)                  | 10.9 (1.6)                                      | 11.4 (1.7)                                         | 11.7 (1.4)                                     | 11.4 (1.7)                 |
| <b>Schizontocidal treatment</b>          |                            |                             |                                                 |                                                    |                                                |                            |
| Chloroquine                              | 1,794 (62.0%)              | 349 (60.5%)                 | 7 (25.0%)                                       | 788 (75.6%)                                        | 619 (51.3%)                                    | 31 (83.8%)                 |
| Artemether-lumefantrine                  | 109 (3.8%)                 | 55 (9.5%)                   | 0 (0.0%)                                        | 45 (4.3%)                                          | 9 (0.7%)                                       | 0 (0.0%)                   |
| Artesunate                               | 65 (2.2%)                  | 65 (11.3%)                  | 0 (0.0%)                                        | 0 (0.0%)                                           | 0 (0.0%)                                       | 0 (0.0%)                   |
| Artesunate-amodiaquine                   | 136 (4.7%)                 | 0 (0.0%)                    | 0 (0.0%)                                        | 108 (10.4%)                                        | 28 (2.3%)                                      | 0 (0.0%)                   |
| Artesunate-mefloquine                    | 1 (0.0%)                   | 0 (0.0%)                    | 1 (3.6%)                                        | 0 (0.0%)                                           | 0 (0.0%)                                       | 0 (0.0%)                   |
| Dihydroartemisinin-<br>piperazine        | 755 (26.1%)                | 91 (15.8%)                  | 5 (17.9%)                                       | 102 (9.8%)                                         | 551 (45.7%)                                    | 6 (16.2%)                  |
| Artesunate sulfadoxine-<br>pyrimethamine | 32 (1.1%)                  | 17 (2.9%)                   | 15 (53.6%)                                      | 0 (0.0%)                                           | 0 (0.0%)                                       | 0 (0.0%)                   |
| <b>Primaquine dosing</b>                 |                            |                             |                                                 |                                                    |                                                |                            |
| PQ total mg/kg dose                      | 5.5 (3.1-7.2)              |                             | 0.8 (0.6-1.3)                                   | 3.0 (3.0-3.8)                                      | 7.1 (6.6-8.1)                                  | 5.4 (4.1-6.0)              |
| PQ start day                             | 0.0 (0.0-0.0)              |                             | 2.0 (0.0-2.0)                                   | 0.0 (0.0-0.0)                                      | 0.0 (0.0-0.0)                                  | 0.0 (0.0-0.0)              |
| <b>Primaquine duration</b>               |                            |                             |                                                 |                                                    |                                                |                            |
| 7-9 days                                 | 1,087/2,268<br>(47.9%)     |                             | 4/27 (14.8%)                                    | 575/1,043<br>(55.1%)                               | 508/1,198<br>(42.4%)                           |                            |
| 14 days                                  | 1,181/2,268<br>(52.1%)     |                             | 23/27 (85.2%)                                   | 468/1,043<br>(44.9%)                               | 690/1,198<br>(57.6%)                           |                            |
| <b>PQ supervised</b>                     |                            |                             |                                                 |                                                    |                                                |                            |
| Unsupervised                             | 128/2,315 (5.5%)           |                             | 18/28 (64.3%)                                   | 81/1,043 (7.8%)                                    | 29/1,207 (2.4%)                                | 0/37 (0.0%)                |
| Partially supervised                     | 808/2,315<br>(35.9%)       |                             | 3/28 (10.7%)                                    | 753/1,043<br>(72.2%)                               | 52/1,207 (4.3%)                                | 0/37 (0.0%)                |
| Fully supervised                         | 1,379/2,315<br>(59.6%)     |                             | 7/28 (25.0%)                                    | 209/1,043<br>(20.0%)                               | 1,126/1,207<br>(93.3%)                         | 37/37 (100.0%)             |
| <b>Relapse periodicity</b>               |                            |                             |                                                 |                                                    |                                                |                            |
| Low periodicity                          | 1,126 (38.9%)              | 317 (54.9%)                 | 22 (78.6%)                                      | 366 (35.1%)                                        | 393 (32.6%)                                    | 28 (75.7%)                 |
| High periodicity                         | 1,766 (61.1%)              | 260 (45.1%)                 | 6 (21.4%)                                       | 677 (64.9%)                                        | 814 (67.4%)                                    | 9 (24.3%)                  |
| <b>Transmission intensity</b>            |                            |                             |                                                 |                                                    |                                                |                            |
| Low                                      | 501 (17.3%)                | 58 (10.1%)                  | 2 (7.1%)                                        | 164 (15.7%)                                        | 247 (20.5%)                                    | 30 (81.1%)                 |

|                                                                 |                     |                 |               |                 |                     |               |
|-----------------------------------------------------------------|---------------------|-----------------|---------------|-----------------|---------------------|---------------|
| Moderate                                                        | 1,377 (47.6%)       | 212 (36.7%)     | 21 (75.0%)    | 563 (54.0%)     | 578 (47.9%)         | 3 (8.1%)      |
| High                                                            | 1,014 (35.1%)       | 307 (53.2%)     | 5 (17.9%)     | 316 (30.3%)     | 382 (31.6%)         | 4 (10.8%)     |
| <b>Region</b>                                                   |                     |                 |               |                 |                     |               |
| Africa                                                          | 426 (14.7%)         | 136 (23.6%)     | 19 (67.9%)    | 78 (7.5%)       | 193 (16.0%)         | 0 (0.0%)      |
| Americas                                                        | 200 (6.9%)          | 0 (0.0%)        | 2 (7.1%)      | 157 (15.1%)     | 17 (1.4%)           | 24 (64.9%)    |
| Asia-Pacific                                                    | 2,266 (78.4%)       | 441 (76.4%)     | 7 (25.0%)     | 808 (77.5%)     | 997 (82.6%)         | 13 (35.1%)    |
| <b>Study follow up</b>                                          |                     |                 |               |                 |                     |               |
| <180 days                                                       | 681 (23.5%)         | 27 (4.7%)       | 17 (60.7%)    | 626 (60.0%)     | 11 (0.9%)           | 0 (0.0%)      |
| ≥180 days                                                       | 2,211 (76.5%)       | 550 (95.3%)     | 11 (39.3%)    | 417 (40.0%)     | 1,196 (99.1%)       | 37 (100.0%)   |
| <b>G6PD status (data from qualitative or quantitative test)</b> |                     |                 |               |                 |                     |               |
| <30% activity                                                   | 38/2,072 (1.8%)     | 21/560 (3.8%)   | 1/15 (6.7%)   | 5/351 (1.4%)    | 1/1,133 (0.1%)      | 10/13 (76.9%) |
| ≥30% activity                                                   | 2,034/2,072 (98.2%) | 539/560 (96.2%) | 14/15 (93.3%) | 346/351 (98.6%) | 1,132/1,133 (99.9%) | 3/13 (23.1%)  |
| <b>CYP2D6 metaboliser status</b>                                |                     |                 |               |                 |                     |               |
| Poor                                                            | 1/40 (2.5%)         |                 |               | 1/40 (2.5%)     |                     |               |
| Intermediate                                                    | 7/40 (17.5%)        |                 |               | 7/40 (17.5%)    |                     |               |
| Extensive                                                       | 30/40 (75.0%)       |                 |               | 30/40 (75.0%)   |                     |               |
| Ultra                                                           | 2/40 (5.0%)         |                 |               | 2/40 (5.0%)     |                     |               |

CI – confidence interval; G6PD – glucose-6-phosphate dehydrogenase; IQR – interquartile range; PQ – primaquine; sd – standard deviation; Data recorded as number (%), median (IQR), mean (SD) or n/N (%); Primaquine dosing and primaquine supervision are based on 2,315 patients administered primaquine; Data were not available for 461 patients on weight, 2,327 patients on malnutrition, 163 patients on presence of fever, 526 patients on day 0 haemoglobin, 820 patients on G6PD status and 2,852 patients on CYP2D6 status.

**Figure S3. Box plot of primaquine dose by age**

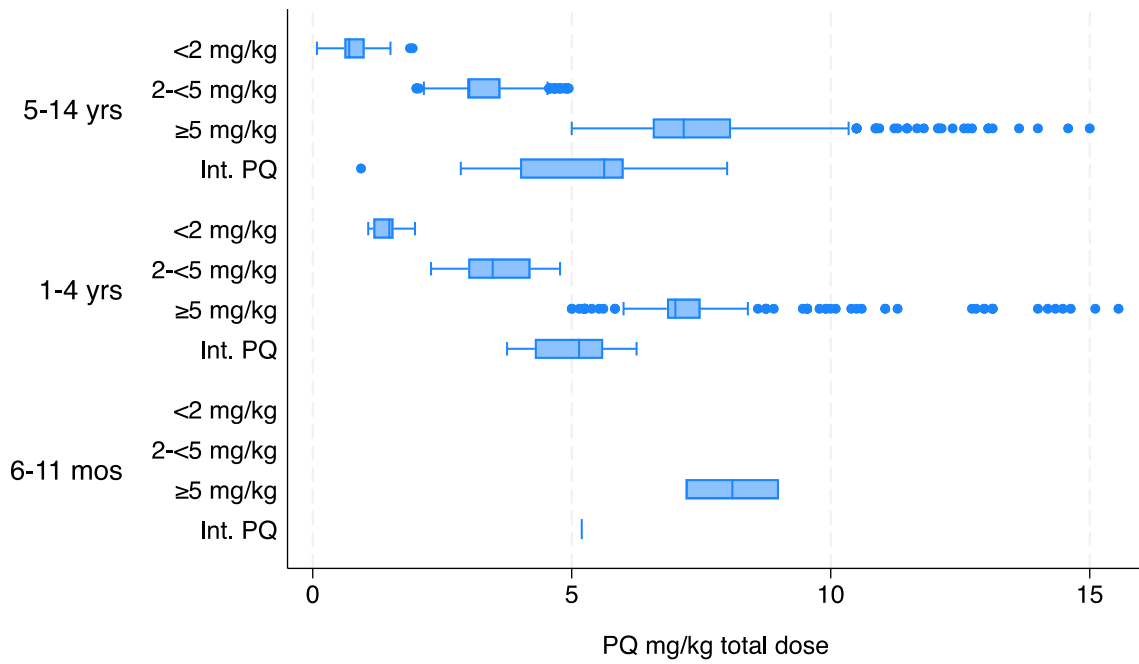

Int. – intermittent; PQ – primaquine. Values above and below  $1.5\times$  the interquartile range from quarter 1 to quarter 3 are shown as outliers.

**Figure S4. Scatter plot of primaquine dose by A) age and B) weight categorised by presence of recurrence between day 7 and day 180**

**A:**

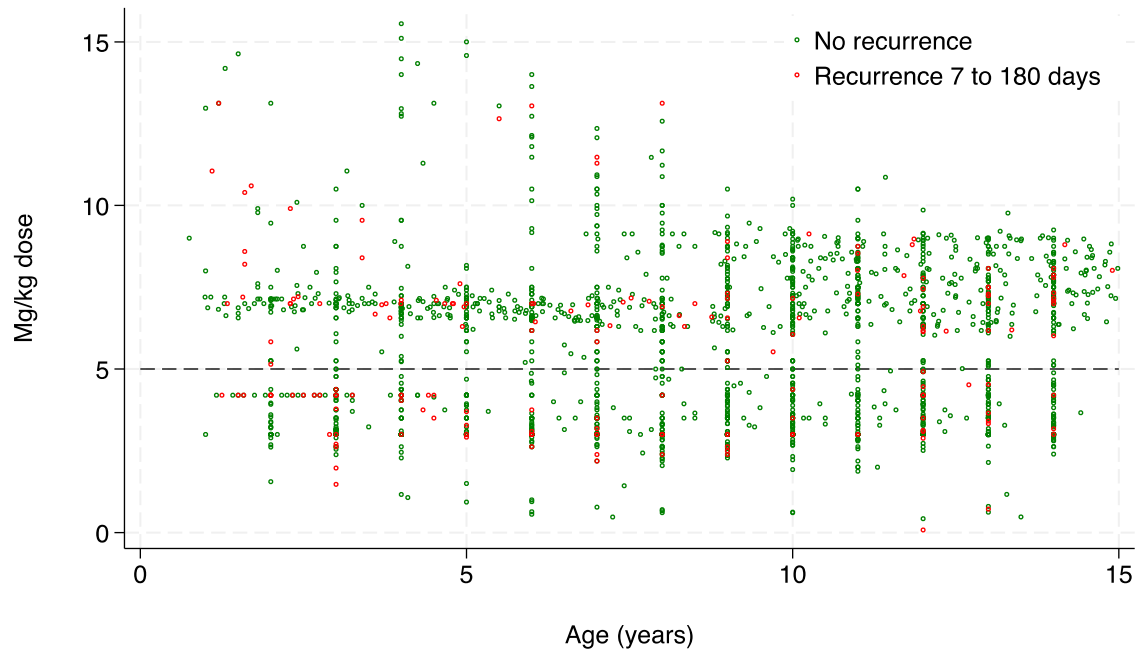

**B:**

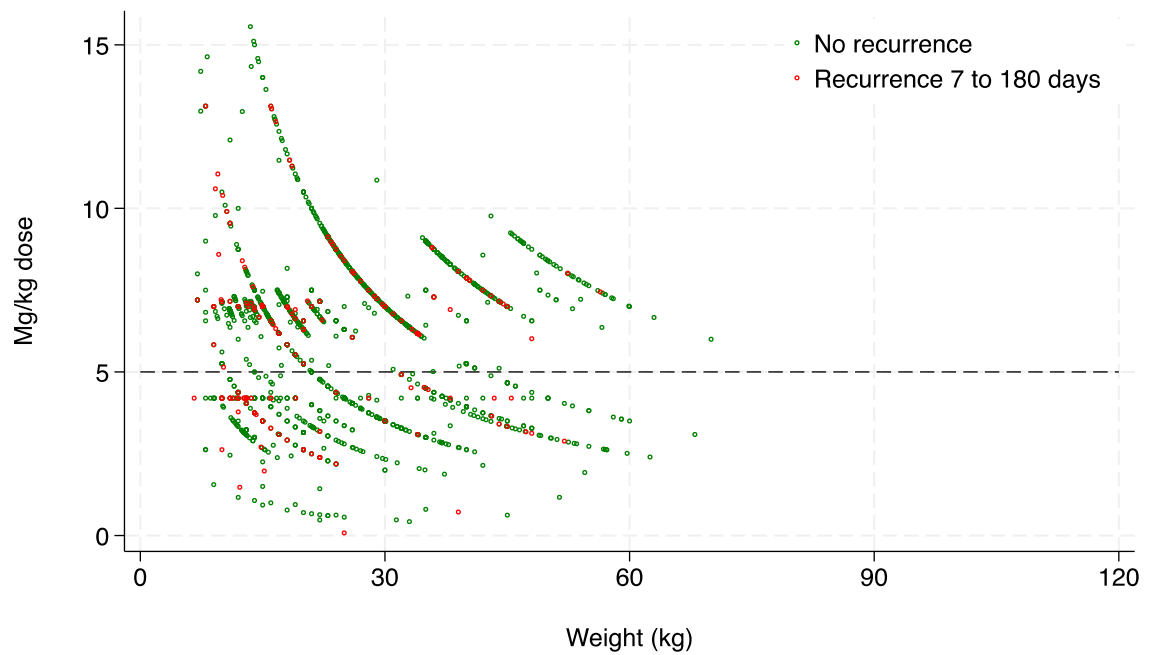

**Figure S5. Kaplan-Meier figure of cumulative incidence of recurrence between day 7 and day 365 for A) total primaquine dosing and use and B) intermittent primaquine dosing**

**A:**

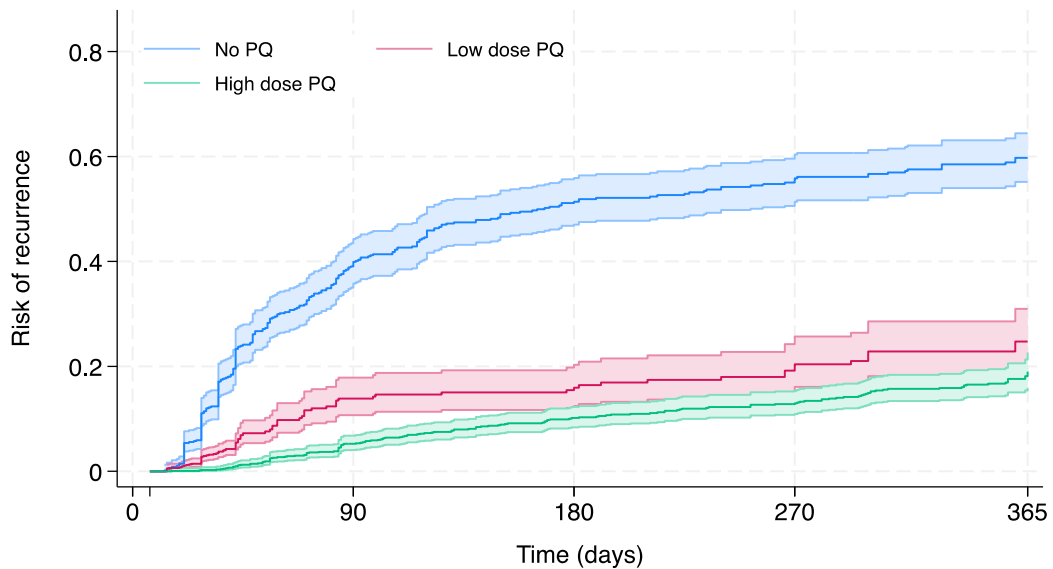

Number at risk

|              |      |     |     |     |    |
|--------------|------|-----|-----|-----|----|
| No PQ        | 562  | 290 | 204 | 165 | 82 |
| Low dose PQ  | 935  | 226 | 188 | 133 | 78 |
| High dose PQ | 1202 | 901 | 680 | 584 | 94 |

**B:**

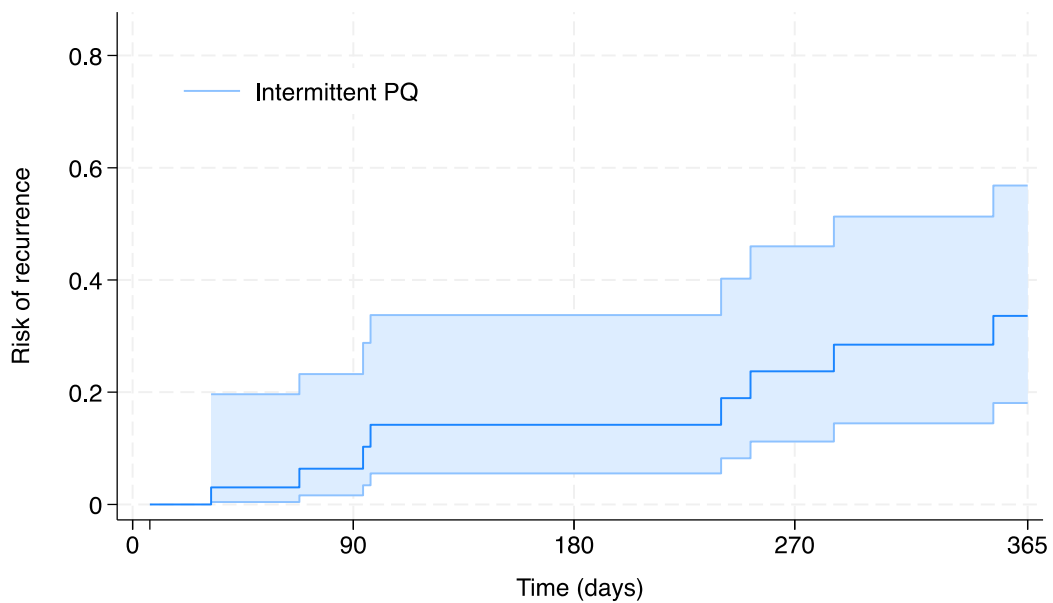

Number at risk

|                 |    |    |    |    |   |
|-----------------|----|----|----|----|---|
| Intermittent PQ | 36 | 27 | 20 | 16 | 2 |
|-----------------|----|----|----|----|---|

Shading shows 95% confidence interval; PQ – primaquine. By day 180, in the no PQ group there were 262 (46.6%) patients with recurrences and 96 (17.1%) patients censored, in the low dose PQ group there were 81 (8.7%) patients with recurrences and 666 (71.2%) patients censored and in the high dose PQ group there were 98 (8.2%) patients with recurrences and 424 (35.3%) patients censored. Log rank test no PQ vs low dose PQ  $p < 0.0001$ , log rank test no PQ vs high dose PQ  $p < 0.0001$ , log rank test low dose PQ vs high dose PQ  $p < 0.0001$ .

**Table S10. Cumulative incidence of recurrence between day 7 and days 42, 90, 180 and 365 by study and primaquine category**

| Study                               | Kaplan-Meier cumulative incidence (%; 95% CI) |                  |                  |                  |
|-------------------------------------|-----------------------------------------------|------------------|------------------|------------------|
|                                     | Day 42                                        | Day 90           | Day 180          | Day 365          |
| Hasugian-2007 <sup>15</sup>         |                                               |                  |                  |                  |
| No primaquine                       | -                                             | -                | -                | -                |
| Low dose primaquine                 | 34.7 (24.1-48.2)                              | -                | -                | -                |
| High dose primaquine                | -                                             | -                | -                | -                |
| Barber-2013 <sup>29</sup>           |                                               |                  |                  |                  |
| No primaquine                       | 0                                             | -                | -                | -                |
| Low dose primaquine                 | -                                             | -                | -                | -                |
| High dose primaquine                | -                                             | -                | -                | -                |
| Pasaribu-2013 <sup>17</sup>         |                                               |                  |                  |                  |
| No primaquine                       | -                                             | -                | -                | -                |
| Low dose primaquine                 | 0                                             | -                | -                | -                |
| High dose primaquine                | 0                                             | 0                | -                | -                |
| Gonzalez-Ceron-2015 <sup>18</sup>   |                                               |                  |                  |                  |
| No primaquine                       | -                                             | -                | -                | -                |
| Low dose primaquine                 | 0                                             | 0                | 0                | 0                |
| High dose primaquine                | 0                                             | 0                | 0                | 0                |
| Yuan-2015 <sup>33</sup>             |                                               |                  |                  |                  |
| No primaquine                       | -                                             | -                | -                | -                |
| Low dose primaquine                 | 6.0 (3.8-9.4)                                 | -                | -                | -                |
| High dose primaquine                | -                                             | -                | -                | -                |
| Longley-2016 <sup>35</sup>          |                                               |                  |                  |                  |
| No primaquine                       | -                                             | -                | -                | -                |
| Low dose primaquine                 | 0                                             | 0                | 0                | -                |
| High dose primaquine                | -                                             | -                | -                | -                |
| Zuluaga-Idarraga-2016 <sup>36</sup> |                                               |                  |                  |                  |
| No primaquine                       | -                                             | -                | -                | -                |
| Low dose primaquine                 | 0                                             | 6.7 (1.0-38.7)   | 20.6 (7.1-51.2)  | -                |
| High dose primaquine                | 0                                             | 0                | 0                | -                |
| Abreha-2017 <sup>19</sup>           |                                               |                  |                  |                  |
| No primaquine                       | 37.5 (27.5-49.7)                              | 58.3 (47.1-70.0) | 64.3 (53.1-75.4) | -                |
| Low dose primaquine                 | 5.5 (2.1-14.0)                                | 15.3 (8.8-25.9)  | 19.7 (12.2-31.0) | -                |
| High dose primaquine                | 0                                             | 0                | 0                | -                |
| Awab-2017 <sup>20</sup>             |                                               |                  |                  |                  |
| No primaquine                       | 2.3 (0.7-6.8)                                 | 6.3 (3.2-12.2)   | 13.7 (8.7-21.1)  | 25.8 (18.6-35.1) |
| Low dose primaquine                 | 0                                             | 0                | 0                | 9.5 (4.9-18.2)   |
| High dose primaquine                | -                                             | -                | -                | -                |
| Chu-2018 <sup>21</sup>              |                                               |                  |                  |                  |
| No primaquine                       | 53.2 (44.9-61.9)                              | 68.6 (60.5-76.5) | 76.3 (68.3-83.6) | 78.2 (69.8-85.5) |
| Low dose primaquine                 | 0                                             | 0                | 0                | 0                |
| High dose primaquine                | 2.7 (0.7-10.4)                                | 4.1 (1.3-12.1)   | 5.6 (2.1-14.3)   | 24.8 (15.6-37.9) |
| Grigg-2018 <sup>38</sup>            |                                               |                  |                  |                  |
| No primaquine                       | 55.6 (21.5-93.4)                              | -                | -                | -                |
| Low dose primaquine                 | 0                                             | -                | -                | -                |
| High dose primaquine                | 16.7 (2.5-72.7)                               | -                | -                | -                |
| Hamid-2018 <sup>22</sup>            |                                               |                  |                  |                  |
| No primaquine                       | 6.7 (1.0-38.7)                                | -                | -                | -                |
| Low dose primaquine                 | -                                             | -                | -                | -                |
| High dose primaquine                | -                                             | -                | -                | -                |
| Chu-2019 <sup>23</sup>              |                                               |                  |                  |                  |
| No primaquine                       | -                                             | -                | -                | -                |
| Low dose primaquine                 | 0                                             | 33.3 (5.5-94.6)  | 33.3 (5.5-94.6)  | 33.3 (5.5-94.6)  |
| High dose primaquine                | 0.5 (0.1-3.7)                                 | 6.4 (3.7-11.0)   | 10.7 (7.0-16.3)  | 15.9 (11.1-22.7) |

|                                   |                  |                   |                   |                  |
|-----------------------------------|------------------|-------------------|-------------------|------------------|
| De Sena-2019 <sup>39</sup>        |                  |                   |                   |                  |
| No primaquine                     | -                | -                 | -                 | -                |
| Low dose primaquine               | 0                | -                 | -                 | -                |
| High dose primaquine              | 0                | -                 | -                 | -                |
| Ladeia-Andrade-2019 <sup>24</sup> |                  |                   |                   |                  |
| No primaquine                     | -                | -                 | -                 | -                |
| Low dose primaquine               | 28.6 (8.0-74.2)  | 0                 | -                 | -                |
| High dose primaquine              | 0                | -                 | -                 | -                |
| Rijal-2019 <sup>25</sup>          |                  |                   |                   |                  |
| No primaquine                     | 0                | -                 | -                 | -                |
| Low dose primaquine               | 0                | -                 | -                 | -                |
| High dose primaquine              | -                | -                 | -                 | -                |
| Taylor-2019 <sup>26</sup>         |                  |                   |                   |                  |
| No primaquine                     | 9.6 (6.1-15.0)   | 35.2 (28.6-42.9)  | 55.7 (48.1-63.6)  | 64.7 (56.9-72.5) |
| Low dose primaquine               | 0                | 0                 | 0                 | 0                |
| High dose primaquine              | 0.8 (0.4-1.8)    | 3.0 (2.0-4.6)     | 8.0 (6.1-10.4)    | 19.1 (12.4-28.8) |
| Poespoprodjo-2022 <sup>27</sup>   |                  |                   |                   |                  |
| No primaquine                     |                  |                   |                   |                  |
| Low dose primaquine               | 0                | 16.7 (4.5-51.8)   | 16.7 (4.5-51.8)#  |                  |
| High dose primaquine              | 1.7 (0.2-11.4)   | 28.2 (17.7-43.0)  | 39.5 (27.2-54.9)# |                  |
| Karunajeewa-unpublished           |                  |                   |                   |                  |
| No primaquine                     | 42.9 (16.3-82.8) | 71.4 (38.9-95.9)* | -                 | -                |
| Low dose primaquine               | 28.6 (8.0-74.2)  | 42.9 (16.3-82.8)* | -                 | -                |
| High dose primaquine              | 0                | 50.0 (19.6-88.9)* | -                 | -                |

CI – confidence interval; Cumulative risk was unable to be determined for some treatment groups due to inclusion of small numbers of children; \* Cumulative incidence at day 84; # cumulative incidence at day 173



**Table S11. Sensitivity analyses estimating hazard ratios for *Plasmodium vivax* recurrence between days 7 and 180 by total primaquine dose**

| Total primaquine dose | Recurrence between day 28 and 180<br>n=2,699 | Patients where actual PQ dose recorded<br>n=1,888 | Adjusted hazard ratio (95% CI)               |                                             |                                                   |                                            |
|-----------------------|----------------------------------------------|---------------------------------------------------|----------------------------------------------|---------------------------------------------|---------------------------------------------------|--------------------------------------------|
|                       |                                              |                                                   | Patients treated with chloroquine<br>n=1,627 | Studies with ≥180 days follow up<br>n=2,137 | Studies which compared PQ versus no PQ<br>n=1,625 | Analysis without shared frailty<br>n=2,699 |
| None                  | Reference                                    | Reference                                         | Reference                                    | Reference                                   | Reference                                         | Reference                                  |
| Low                   | 0.18 (0.11, 0.27)                            | 0.16 (0.08, 0.31)                                 | 0.16 (0.09, 0.30)                            | 0.14 (0.09, 0.22)                           | 0.18 (0.11, 0.31)                                 | 0.27 (0.21, 0.35)                          |
| High                  | 0.10 (0.07, 0.13)                            | 0.09 (0.07, 0.12)                                 | 0.08 (0.05, 0.11)                            | 0.09 (0.07, 0.12)                           | 0.09 (0.06, 0.12)                                 | 0.14 (0.11, 0.17)                          |

CI – confidence interval; PQ – primaquine; Sensitivity analyses for multivariable Cox regression model adjusted for primaquine treatment category, age, sex and baseline parasitaemia with shared frailty for study site unless otherwise stated.

**Table S12. Sensitivity analysis excluding one study at a time for hazard ratio of *Plasmodium vivax* recurrence between days 7 and 180 following primaquine treatment group compared with no primaquine**

| Total primaquine dose | Range of AHR | Coefficient of Variation (%) |
|-----------------------|--------------|------------------------------|
| None                  | Reference    | -                            |
| Low                   | 0.15-0.22    | 6.25                         |
| High                  | 0.08-0.10    | 3.28                         |

AHR – adjusted hazard ratio; Sensitivity analyses for multivariable Cox regression model adjusted for primaquine treatment category, age sex and baseline parasitaemia with shared frailty for study site.

## **Text S2. Additional efficacy analysis results**

**Low dose primaquine versus high dose primaquine:** The rate of recurrence was significantly lower following high dose primaquine in children (AHR 0.54, 0.35-0.85). These results were consistent in multiple sensitivity analyses (Tables S11-S12). In a subgroup analysis, there was a similar reduction in the rate of recurrence following high dose compared with low dose primaquine in children in both low relapse periodicity regions (AHR 0.52, 0.27-1.00) and high relapse periodicity regions (AHR 0.64, 0.33 to 1.25).

**Effect of the total dose of primaquine as a continuous variable:** In a Cox model controlling for age, sex and baseline parasitaemia with total mg/kg primaquine dose as a continuous variable, there was no change in the rate of recurrence between day 7 and 180 for children following a 1 mg/kg increase in total primaquine dose (AHR 0.94, 95%CI 0.84 to 1.05). However, analysis between studies showed marked heterogeneity in the rate of recurrence with significantly high risks of recurrences with primaquine in studies conducted in Melanesia; Table S10.<sup>15,27</sup> This region is recognised as having the highest reported relapse periodicity globally.<sup>49</sup> In a post-hoc analysis excluding the Melanesian studies there was a significant reduction in the rate of recurrence between day 7 and 180 following a 1 mg/kg increase in total primaquine dose, that was apparent in children (AHR 0.84, 95%CI 0.72 to 0.99); Supplementary Figure S6).

**Effect of duration of primaquine:** Data on the duration of primaquine treatment were available for 2,241 children. Of 1,043 children treated with low total dose primaquine, 575 (55.1%) were treated for 7 days and 468 (44.9%) for 14 days. Of 1,198 children treated with high dose primaquine, 508 (42.4%) were treated for 7 days and 690 (57.6%) for 14 days. After adjusting for total primaquine mg/kg dose, age, sex and baseline parasitaemia, there was a non-significant trend for a lower rate of recurrence between day 7 and 180, following a 14-day low dose primaquine regimen compared with a low dose 7-day regimen (AHR 0.76, 95%CI 0.14-4.10). The same trend was apparent for children treated with a 14-day high dose primaquine regimen compared to a 7-day high dose regimen (AHR 0.75 (0.48-1.18); Figure 2).

**Figure S6. Adjusted hazard ratio for recurrence between day 7 and 180 compared with primaquine total mg/kg dose for children**

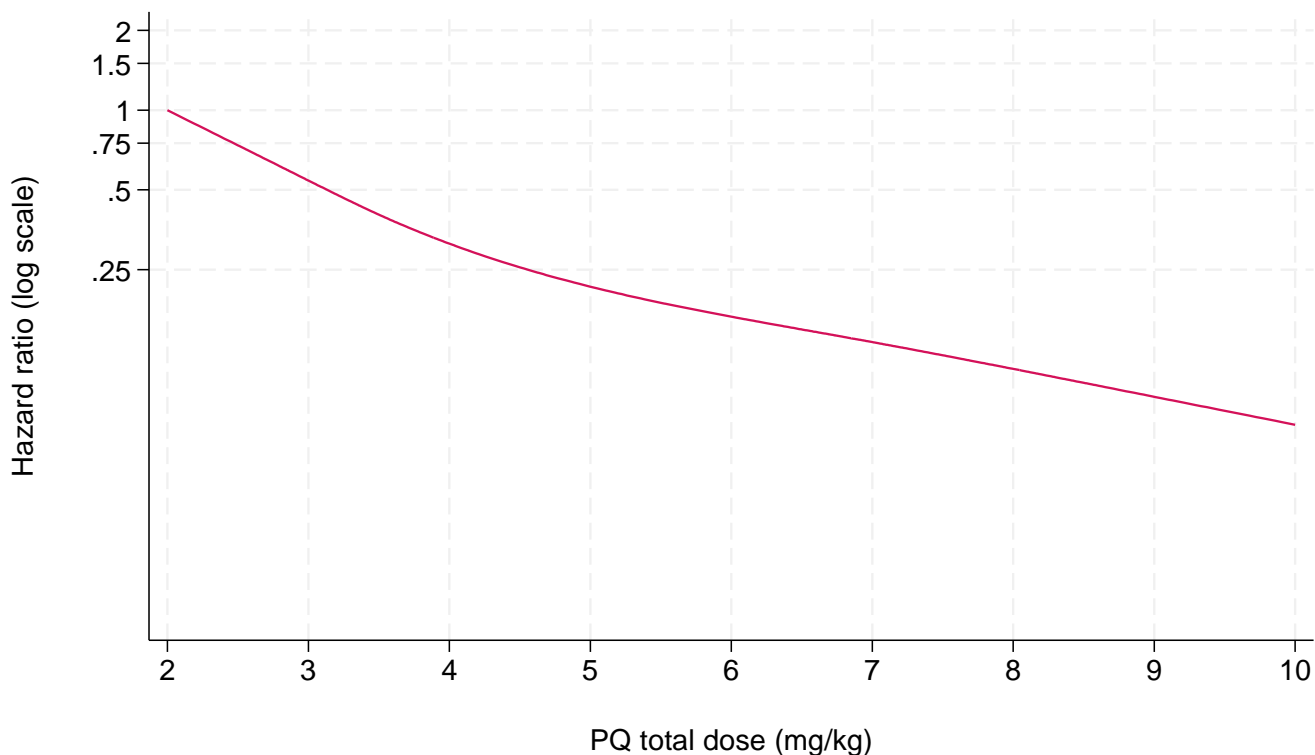

PQ – primaquine; Spline model with 4 knots at default locations (5<sup>th</sup>, 35<sup>th</sup>, 65<sup>th</sup> and 95<sup>th</sup> percentiles) based on Cox regression model adjusted for age, sex and baseline parasitaemia with shared frailty for study site. Three studies from Melanesia (including one unpublished study) have been excluded.<sup>15,27</sup>

**Table S13. Baseline characteristics and demographic features for gastrointestinal tolerability analysis by age categories**

|                                                                                                                          | Total<br>N=1,993          | Children ≥5 to <15 years<br>N=1,615 | Children <5 years<br>N=378 |
|--------------------------------------------------------------------------------------------------------------------------|---------------------------|-------------------------------------|----------------------------|
| <b>Daily PQ dose (mg/kg) category</b>                                                                                    |                           |                                     |                            |
| No primaquine                                                                                                            | 430 (21.6%)               | 361 (22.4%)                         | 69 (18.3%)                 |
| Low dose daily primaquine (<0.375 mg/kg/day)                                                                             | 450 (22.6%)               | 346 (21.4%)                         | 104 (27.5%)                |
| Intermediate dose daily primaquine (≥0.375 & <0.75 mg/kg/day)                                                            | 518 (26.0%)               | 426 (26.4%)                         | 92 (24.3%)                 |
| High dose daily primaquine (≥0.75 mg/kg/day)                                                                             | 595 (29.9%)               | 482 (29.8%)                         | 113 (29.9%)                |
| <b>Age (years)</b>                                                                                                       | 9.0 (5.9-12.0)            | 10.0 (7.4-12.0)                     | 3.0 (2.5-4.0)              |
| <b>Female</b>                                                                                                            | 897 (45.0%)               | 724 (44.8%)                         | 173 (45.8%)                |
| <b>Weight (kg)</b>                                                                                                       | 24.6 (10.9)               | 27.5 (10.2)                         | 12.5 (2.5)                 |
| <b>Malnutrition</b>                                                                                                      | 113 (24.7%)               | 19 (23.8%)                          | 94 (24.9%)                 |
| <b>Haemoglobin day 0 (g/dL)</b>                                                                                          | 11.6 (1.5)                | 11.8 (1.5)                          | 10.8 (1.6)                 |
| <b>Parasite density on day 0 (/μL)</b>                                                                                   | 3703.7<br>(1166.7-9200.0) | 3648.1<br>(1144.4-8940.7)           | 3990.7<br>(1296.3-10687.5) |
| <b>Fever on day 0</b>                                                                                                    | 1,838 (92.9%)             | 1,477 (92.3%)                       | 361 (95.8%)                |
| <b>Schizontocidal treatment</b>                                                                                          |                           |                                     |                            |
| Artemether-lumefantrine                                                                                                  | 117 (5.9%)                | 88 (5.4%)                           | 29 (7.7%)                  |
| Artesunate                                                                                                               | 136 (6.8%)                | 92 (5.7%)                           | 44 (11.6%)                 |
| Artesunate-amodiaquine                                                                                                   | 32 (1.6%)                 | 30 (1.9%)                           | 2 (0.5%)                   |
| Artesunate sulfadoxine-pyrimethamine                                                                                     | 1,089 (54.6%)             | 907 (56.2%)                         | 182 (48.1%)                |
| Chloroquine                                                                                                              | 619 (31.1%)               | 498 (30.8%)                         | 121 (32.0%)                |
| <b>G6PD status (data from qualitative or quantitative test)</b>                                                          |                           |                                     |                            |
| Deficient (<30% activity)                                                                                                | 6 (0.3%)                  | 3 (0.2%)                            | 3 (0.8%)                   |
| Normal (≥30% activity)                                                                                                   | 1,572 (78.9%)             | 1,275 (78.9%)                       | 297 (78.6%)                |
| Unknown                                                                                                                  | 415 (20.8%)               | 337 (20.9%)                         | 78 (20.6%)                 |
| <b>G6PD status (data from qualitative or quantitative test if deficient and from quantitative test if ≥30% activity)</b> |                           |                                     |                            |
| Deficient (<30%)                                                                                                         | 6 (0.3%)                  | 3 (0.2%)                            | 3 (0.8%)                   |
| Intermediate (≥30-<70%)                                                                                                  | 18 (0.9%)                 | 15 (0.9%)                           | 3 (0.8%)                   |
| Normal (≥70%)                                                                                                            | 495 (24.8%)               | 415 (25.7%)                         | 80 (21.2%)                 |
| Unknown                                                                                                                  | 1,474 (74.0%)             | 1,182 (73.2%)                       | 292 (77.2%)                |
| <b>CYP2D6A metabolizer status</b>                                                                                        |                           |                                     |                            |
| Poor                                                                                                                     | 1 (5%)                    | 1 (5%)                              |                            |
| Intermediate                                                                                                             | 1 (5%)                    | 1 (5%)                              |                            |
| Extensive                                                                                                                | 20 (91%)                  | 20 (91%)                            |                            |
| <b>Geographical region</b>                                                                                               |                           |                                     |                            |
| Africa                                                                                                                   | 425 (21.3%)               | 342 (21.2%)                         | 83 (22.0%)                 |
| Americas                                                                                                                 | 63 (3.2%)                 | 58 (3.6%)                           | 5 (1.3%)                   |
| Asia-Pacific                                                                                                             | 1,505 (75.5%)             | 1,215 (75.2%)                       | 290 (76.7%)                |
| <b>Relapse periodicity</b>                                                                                               |                           |                                     |                            |
| Low periodicity                                                                                                          | 996 (50.0%)               | 837 (51.8%)                         | 159 (42.1%)                |
| High periodicity                                                                                                         | 997 (50.0%)               | 778 (48.2%)                         | 219 (57.9%)                |
| <b>Transmission intensity of study site</b>                                                                              |                           |                                     |                            |
| Low                                                                                                                      | 595 (29.9%)               | 502 (31.1%)                         | 93 (24.6%)                 |
| Moderate                                                                                                                 | 389 (19.5%)               | 313 (19.4%)                         | 76 (20.1%)                 |
| High                                                                                                                     | 1,009 (50.6%)             | 800 (49.5%)                         | 209 (55.3%)                |

Data show number (%), median (IQR) or mean (SD). Data were not available for 7 patients for weight, 1,536 patients for nutrition status, 15 patients for presence of fever on day 0, 55 patients on haemoglobin on day 0 and 1,971 patients for CYP2D6A status. IQR – interquartile range, SD – standard deviation.

**Figure S7. Distribution of primaquine daily dose by primaquine mg/kg daily dose category and age category**

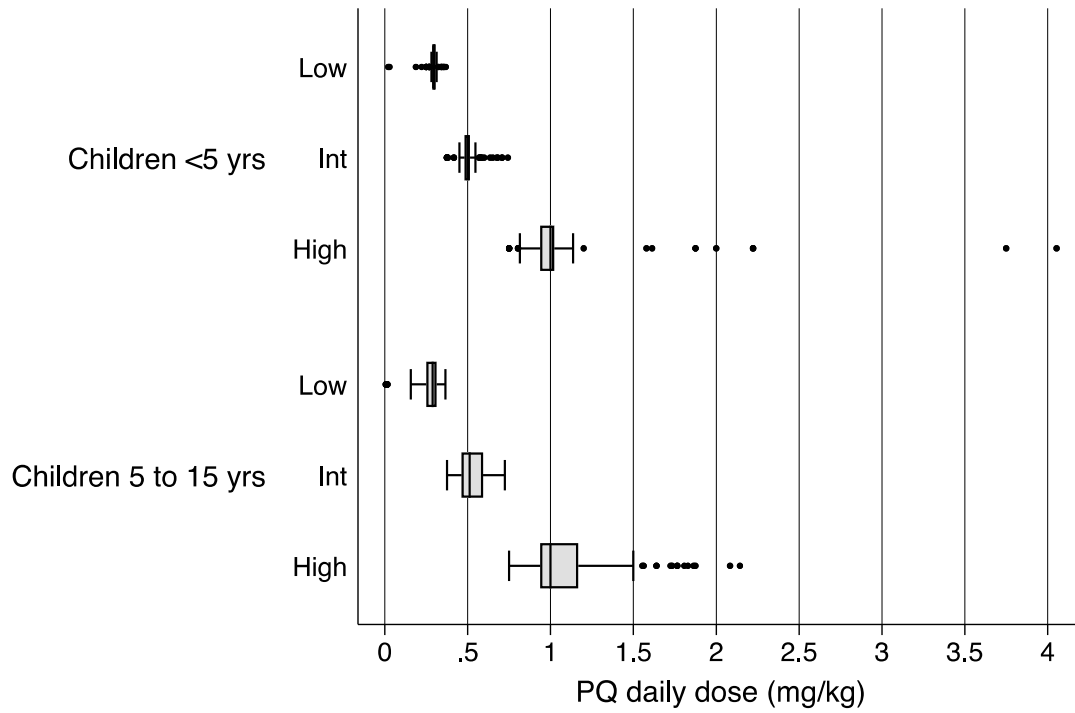

Primaquine daily dose categories: Low =  $<0.375$  mg/kg/day, Int (intermediate) =  $\geq 0.375$  mg/kg/day and  $<0.750$  mg/kg/day, and High =  $\geq 0.750$  mg/kg/day. Values above and below  $1.5\times$  the interquartile range from quarter 1 to quarter 3 are shown as outliers.

**Figure S8. Unadjusted risk of gastrointestinal symptoms in children on day 0, days 1-2 and days 5-7**

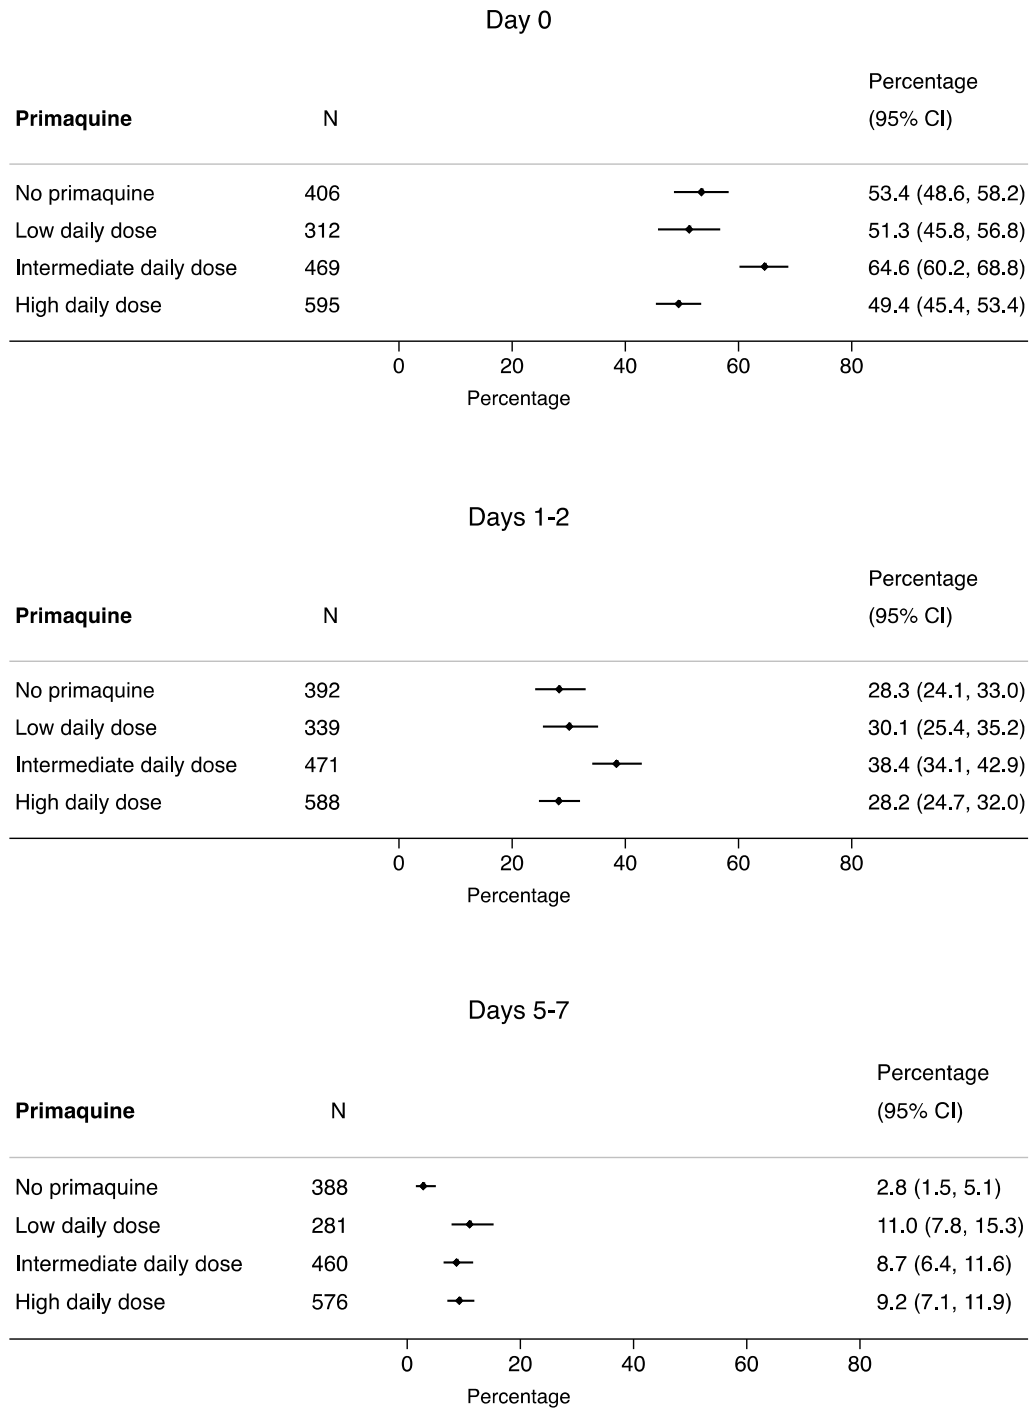

The risk of the composite outcome (composite of vomiting or anorexia or diarrhoea) was calculated for children by primaquine daily dose category as the number of individuals experiencing a symptom as a proportion of the number of individuals asked about the symptom. The Confidence Intervals (CIs) are Agresti-Coull CIs.

**Figure S9. Covariate-adjusted estimates for gastrointestinal intolerance on days 5-7 by primaquine daily dose categories and age categories**

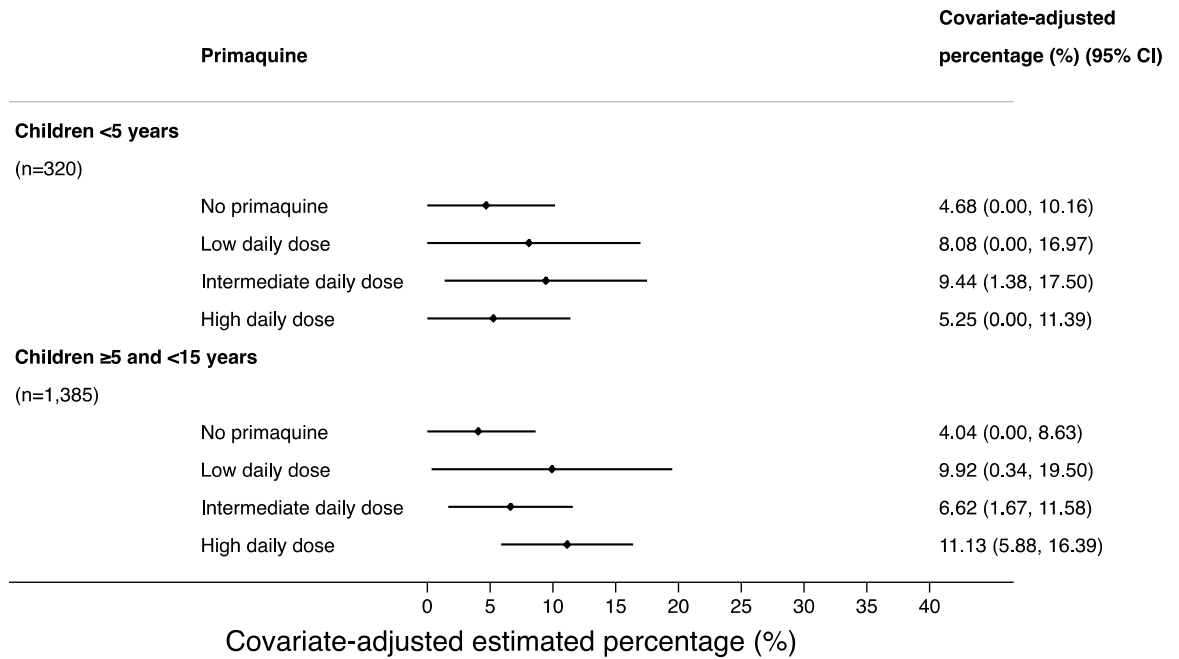

CI – confidence interval; low daily dose ~0.25 mg/kg/day; intermediate daily dose ~5 mg/kg/day; high daily dose - ~1 mg/kg/day; Generalised estimating equations modified Poisson regression models adjusting for age category, sex (male or female) and ( $1\log_{10}$ ) baseline parasite density, clustering by study site and cluster robust error estimates. Covariate-adjusted proportions were estimated at the mean values of the covariates.



**Table S14. Covariate-adjusted estimated percentages (95% CI) from sensitivity analyses for the composite gastrointestinal tolerability outcome assessed on days 5-7**

|                         | <b>Restricted to those asked about all three symptoms that make up the composite outcome</b> | <b>Adjusting for reporting of symptoms on day 0</b> | <b>Restricted to studies with a no PQ group as well as a PQ treatment group</b> |
|-------------------------|----------------------------------------------------------------------------------------------|-----------------------------------------------------|---------------------------------------------------------------------------------|
|                         | N=1,224                                                                                      | N=1,671                                             | N=1,366                                                                         |
| <b>Children</b>         |                                                                                              |                                                     |                                                                                 |
| No primaquine           | 2.5 (0 to 7.5)                                                                               | 2.6 (1.1 to 6.3)                                    | 2.4 (1.9 to 6.7)                                                                |
| Low daily dose          | 15.6 (0 to 34.4)                                                                             | 5.7 (0 to 12.5)                                     | 3.4 (0 to 8.1)                                                                  |
| Intermediate daily dose | 5.4 (0.5 to 10.3)                                                                            | 5.0 (1.0 to 9.1)                                    | 5.3 (0.3 to 10.3)                                                               |
| High daily dose         | 7.9 (3.7 to 12.1)                                                                            | 7.5 (4.0 to 11.0)                                   | 8.0 (4.4 to 11.7)                                                               |

For each analysis, generalised estimating equations modified Poisson models were fitted adjusting for age, sex and ( $\log_{10}$ ) baseline parasite density with a log link, clustering by study site, exchangeable correlation structure and cluster robust error estimates. The covariate-adjusted percentage of patients reporting the outcome was estimated at the mean values of the covariates.

**Table S15. Covariate adjusted estimated percentages (95% CI) from sensitivity analyses for the composite gastrointestinal tolerability outcome assessed on days 1-2, restricted to patients who started primaquine on day 0**

|                         | Restricted to patients treated with chloroquine | Restricted to patients treated with dihydroartemesinin-piperaquine |
|-------------------------|-------------------------------------------------|--------------------------------------------------------------------|
|                         | N=1,020                                         | N=471                                                              |
| <b>Children</b>         |                                                 |                                                                    |
| No primaquine           | 21.8 (7.0 to 36.6)                              | 44.7 (35.2 to 54.2)                                                |
| Low daily dose          | 17.4 (3 to 31.8)                                | 9.5 (8.5 to 10.5)                                                  |
| Intermediate daily dose | 26.2 (13.0 to 39.5)                             | 37.4 (29.4 to 45.4)                                                |
| High daily dose         | 23.0 (11.0 to 35.1)                             | 42.3 (40.9 to 43.7)                                                |

For each analysis, generalised estimating equations modified Poisson models were fitted adjusting for age, sex and ( $\log_{10}$ ) baseline parasite density with a log link, clustering by study site, exchangeable correlation structure and cluster robust error estimates. The covariate-adjusted percentage of patients reporting the outcome was estimated at the mean values of the covariates.

**Table S16 Contribution of patients from each study included in the analysis of the primary composite gastrointestinal tolerability end point on days 5-7 to each primaquine dose category**

| Study                 | Daily PQ dose (mg/kg) category (n) |                                              |                                                               | Total      |                                              |
|-----------------------|------------------------------------|----------------------------------------------|---------------------------------------------------------------|------------|----------------------------------------------|
|                       | No primaquine                      | Low dose daily primaquine (<0.375 mg/kg/day) | Intermediate dose daily primaquine (≥0.375 & <0.75 mg/kg/day) |            | High dose daily primaquine (≥0.75 mg/kg/day) |
| Pasaribu-2013         | 0                                  | 22                                           | 12                                                            | 0          | 34                                           |
| Thanh-2015            | 0                                  | 0                                            | 0                                                             | 150        | 150                                          |
| Hasugian-2007         | 0                                  | 51                                           | 0                                                             | 0          | 51                                           |
| Gonzalez-Ceron-2015   | 0                                  | 14                                           | 4                                                             | 0          | 18                                           |
| Zuluaga-Idarraga-2016 | 0                                  | 11                                           | 6                                                             | 0          | 17                                           |
| Abreha-2017           | 74                                 | 75                                           | 2                                                             | 0          | 151                                          |
| Taylor-2019           | 182                                | 0                                            | 362                                                           | 416        | 960                                          |
| Ladeia-Andrade-2019   | 0                                  | 0                                            | 20                                                            | 3          | 23                                           |
| Awab-2017             | 132                                | 100                                          | 20                                                            | 3          | 255                                          |
| Poespoprodjo-2021     | 0                                  | 8                                            | 34                                                            | 4          | 46                                           |
| <b>Total</b>          | <b>388</b>                         | <b>281</b>                                   | <b>460</b>                                                    | <b>576</b> | <b>1,705</b>                                 |

**Figure S10. Sensitivity analysis for the covariate-adjusted estimated percentage of patients reporting gastrointestinal symptoms (95% CI) assessed on days 5-7, excluding one study at a time**

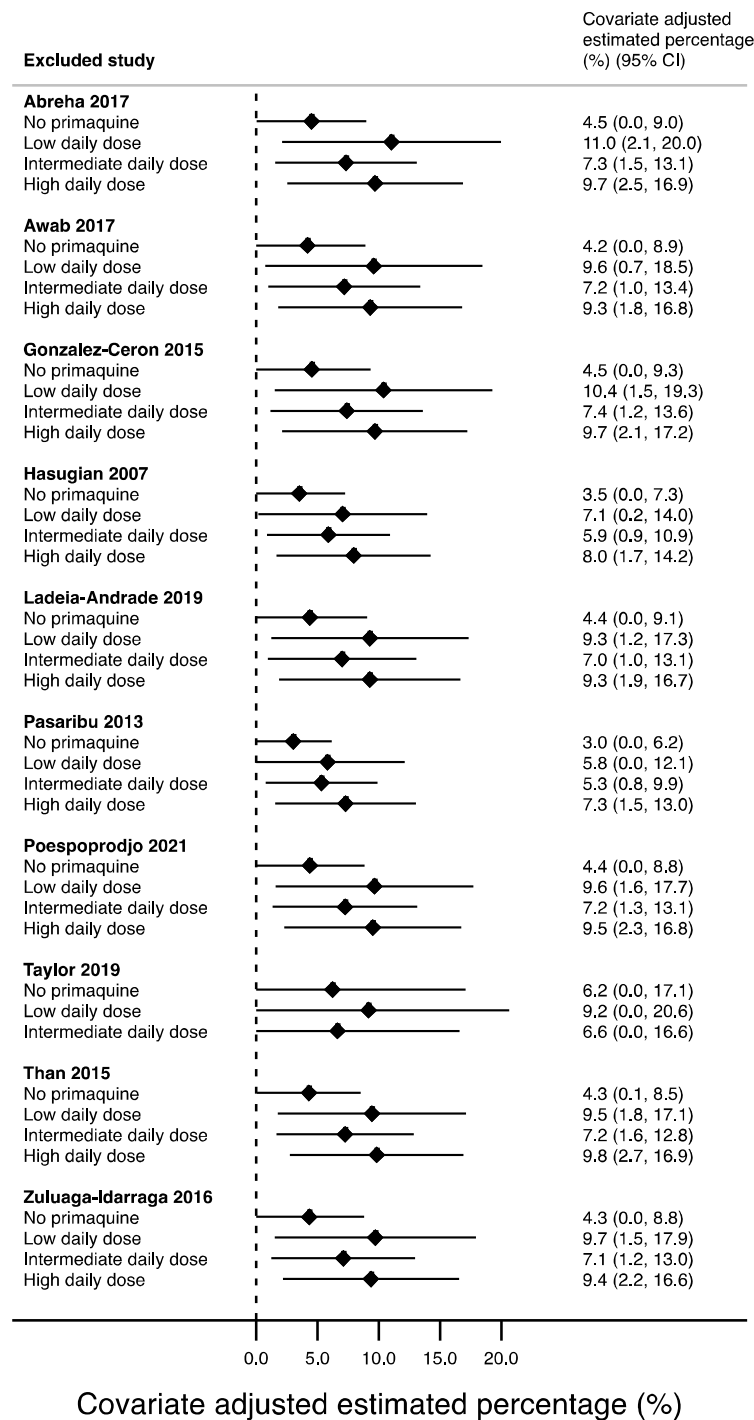

CI – confidence interval; Multivariable logistic regression mixed effects models were fitted adjusting for age, sex and (log<sub>10</sub>) baseline parasite density with random intercepts by study site. Taylor-2019<sup>26</sup> was influential and affected the estimated proportions. However, after excluding this study children still had a higher percentage of gastrointestinal intolerance following primaquine relative to patients not treated with primaquine, when estimable.

**Table S17. Risk of acute vomiting on days 0-2 and 3-13 by primaquine daily dose categories in children**

| PQ daily dose category | Risk of acute vomiting<br>Days 0-2 |                         | Risk of acute vomiting<br>Days 3-13 |                         |
|------------------------|------------------------------------|-------------------------|-------------------------------------|-------------------------|
|                        | Children<br><5 yrs                 | Children<br>5 - <15 yrs | Children<br><5 yrs                  | Children<br>5 - <15 yrs |
| Low                    | 0%<br>(0/28)                       | 0.6%<br>(1/161)         | 0%<br>(0/16)                        | 0%<br>(0/69)            |
| Intermediate           | 7.1%<br>(6/85)                     | 1.2%<br>(4/346)         | 0%<br>(0/62)                        | 0.3%<br>(1/307)         |
| High                   | 1.8%<br>(2/113)                    | 2.1%<br>(10/479)        | 0%<br>(0/104)                       | 0.2%<br>(1/469)         |

**Table S18. Baseline characteristics and demographic features of patients included in the haematological safety analysis by age groups**

|                                                                                                                          | Total<br>N=2,539                 | Children ≥5 to <15 years<br>N=2,084 | Children <5 years<br>N=455        |
|--------------------------------------------------------------------------------------------------------------------------|----------------------------------|-------------------------------------|-----------------------------------|
| <b>Daily PQ dose (mg/kg) category</b>                                                                                    |                                  |                                     |                                   |
| No primaquine                                                                                                            | 626 (24.7%)                      | 516 (24.8%)                         | 110 (24.2%)                       |
| Low dose daily primaquine (<0.375 mg/kg/day)                                                                             | 413 (16.3%)                      | 324 (15.5%)                         | 89 (19.6%)                        |
| Intermediate dose daily primaquine (≥0.375 & <0.75 mg/kg/day)                                                            | 735 (28.9%)                      | 612 (29.4%)                         | 123 (27.0%)                       |
| High dose daily primaquine (≥0.75 mg/kg/day)                                                                             | 698 (27.5%)                      | 574 (27.5%)                         | 124 (27.3%)                       |
| Intermittent PQ                                                                                                          | 67 (2.6%)                        | 58 (2.8%)                           | 9 (2.0%)                          |
| <b>Age (years)</b>                                                                                                       | <b>9.0 (6.0-12.0)</b>            | <b>10.0 (7.1-12.0)</b>              | <b>3.2 (2.5-4.0)</b>              |
| <b>Female</b>                                                                                                            | <b>1,160 (45.7%)</b>             | <b>947 (45.4%)</b>                  | <b>213 (46.8%)</b>                |
| <b>Weight (kg)</b>                                                                                                       | <b>24.5 (10.8)</b>               | <b>27.1 (10.1)</b>                  | <b>12.4 (2.5)</b>                 |
| <b>Malnutrition</b>                                                                                                      | <b>149 (25.9%)</b>               | <b>25 (20.7%)</b>                   | <b>124 (27.3%)</b>                |
| <b>Haemoglobin day 0 (g/dL)</b>                                                                                          | <b>11.6 (1.5)</b>                | <b>11.8 (1.4)</b>                   | <b>10.7 (1.5)</b>                 |
| <b>Parasite density on day 0 (/μL)</b>                                                                                   | <b>3800.0</b><br>(1196.0-9720.0) | <b>3759.3</b><br>(1183.8-9563.0)    | <b>4040.0</b><br>(1260.0-10780.0) |
| <b>Fever on day 0</b>                                                                                                    | <b>2,205 (93.8%)</b>             | <b>1,780 (93.4%)</b>                | <b>425 (95.7%)</b>                |
| <b>Schizontocidal treatment</b>                                                                                          |                                  |                                     |                                   |
| Artemether-lumefantrine                                                                                                  | 119 (4.7%)                       | 85 (4.1%)                           | 34 (7.5%)                         |
| Artesunate                                                                                                               | 62 (2.4%)                        | 43 (2.1%)                           | 19 (4.2%)                         |
| Artesunate-amodiaquine                                                                                                   | 124 (4.9%)                       | 88 (4.2%)                           | 36 (7.9%)                         |
| Artesunate sulfadoxine-pyrimethamine                                                                                     | 32 (1.3%)                        | 30 (1.4%)                           | 2 (0.4%)                          |
| Chloroquine                                                                                                              | 1,464 (57.7%)                    | 1,233 (59.2%)                       | 231 (50.8%)                       |
| Dihydroartemisinin-piperaquine                                                                                           | 738 (29.1%)                      | 605 (29.0%)                         | 133 (29.2%)                       |
| <b>G6PD status (data from qualitative or quantitative test)</b>                                                          |                                  |                                     |                                   |
| Deficient (<30% activity)                                                                                                | 38 (1.5%)                        | 28 (1.3%)                           | 10 (2.2%)                         |
| Normal (≥30% activity)                                                                                                   | 2,144 (84.4%)                    | 1,768 (84.8%)                       | 376 (82.6%)                       |
| Unknown                                                                                                                  | 357 (14.1%)                      | 288 (13.8%)                         | 69 (15.2%)                        |
| <b>G6PD status (data from qualitative or quantitative test if deficient and from quantitative test if ≥30% activity)</b> |                                  |                                     |                                   |
| Deficient (<30%)                                                                                                         | 38 (1.5%)                        | 28 (1.3%)                           | 10 (2.2%)                         |
| Intermediate (≥30-<70%)                                                                                                  | 19 (0.7%)                        | 16 (0.8%)                           | 3 (0.7%)                          |
| Normal (≥70%)                                                                                                            | 507 (20.0%)                      | 426 (20.4%)                         | 81 (17.8%)                        |
| Unknown                                                                                                                  | 1,975 (77.8%)                    | 1,614 (77.4%)                       | 361 (79.3%)                       |
| <b>CYP2D6A metabolizer status</b>                                                                                        |                                  |                                     |                                   |
| Poor                                                                                                                     | 1 (5%)                           | 1 (5%)                              | -                                 |
| Intermediate                                                                                                             | 1 (5%)                           | 1 (5%)                              | -                                 |
| Extensive                                                                                                                | 20 (91%)                         | 20 (91%)                            | -                                 |
| <b>Geographical region</b>                                                                                               |                                  |                                     |                                   |
| Africa                                                                                                                   | 419 (16.5%)                      | 335 (16.1%)                         | 84 (18.5%)                        |
| Americas                                                                                                                 | 27 (1.1%)                        | 27 (1.3%)                           | 0 (0.0%)                          |
| Asia-Pacific                                                                                                             | 2,093 (82.4%)                    | 1,722 (82.6%)                       | 371 (81.5%)                       |
| <b>Relapse periodicity</b>                                                                                               |                                  |                                     |                                   |
| Low periodicity                                                                                                          | 1,092 (43.0%)                    | 928 (44.5%)                         | 164 (36.0%)                       |
| High periodicity                                                                                                         | 1,447 (57.0%)                    | 1,156 (55.5%)                       | 291 (64.0%)                       |
| <b>Transmission intensity of study site</b>                                                                              |                                  |                                     |                                   |
| Low                                                                                                                      | 583 (23.0%)                      | 493 (23.7%)                         | 90 (19.8%)                        |
| Moderate                                                                                                                 | 964 (38.0%)                      | 802 (38.5%)                         | 162 (35.6%)                       |
| High                                                                                                                     | 992 (39.1%)                      | 789 (37.9%)                         | 203 (44.6%)                       |

Data show number (%), median (IQR) or mean (SD). Data were not available for 9 patients for weight, 1,964 patients for nutrition status, 191 patients for parasite density on day 0, 189 patients for presence of fever on day 0 and 2,517 patients for CYP2D6A status. IQR – interquartile range, SD – standard deviation.

**Table S19. Details of patients experiencing haematological outcomes**

| ID | Sex    | Age | PQ daily dose category | G6PD activity | Hb on day 0 | Lowest Hb on days 1-13 | Day of lowest Hb | Day 2-3 Hb | Day 5-7 Hb | Hb drop $\geq$ 25% to $<$ 7 g/dL | Hb drop $>$ 5 g/dL | Blood transfusion required |
|----|--------|-----|------------------------|---------------|-------------|------------------------|------------------|------------|------------|----------------------------------|--------------------|----------------------------|
| 1  | Female | 13  | High                   | 61.5          | 8.8         | 4.4                    | 5                | 5.5        | 4.4        | Yes                              | No                 | Yes                        |
| 2  | Male   | 5   | Intermediate           | $\geq$ 30%    | 10.1        | 5.9                    | 3                | 5.9        | 7.84       | Yes                              | No                 | No                         |
| 3  | Female | 5   | No PQ                  | $\geq$ 30%    | 10.3        | 6.3                    | 3                | 6.3        | 9.9        | Yes                              | No                 | .                          |
| 4  | Female | 12  | High                   | $\geq$ 30%    | 10.5        | 6.3                    | 7                | 9.0        | 6.3        | Yes                              | No                 | No                         |
| 5  | Female | 4   | No PQ                  | $\geq$ 30%    | 9.6         | 6.4                    | 3                | 6.4        | 10         | Yes                              | No                 | .                          |
| 6  | Female | 10  | Intermediate           | $\geq$ 30%    | 9.0         | 6.7                    | 5                | 7.1        | 6.7        | Yes                              | No                 | No                         |
| 7  | Female | 13  | High                   | $\geq$ 30%    | 11.0        | 6.7                    | 6                | 7.81       | 6.7        | Yes                              | No                 | No                         |
| 8  | Male   | 3   | Intermediate           | $\geq$ 30%    | 10.2        | 6.8                    | 3                | 6.8        | 7.7        | Yes                              | No                 | No                         |
| 9  | Female | 10  | High                   | 37.4%         | 11.6        | 6.9                    | 3                | 6.9        | 8.4        | Yes                              | No                 | No                         |
| 10 | Female | 10  | Intermediate           | 75.9%         | 12.6        | 7.5                    | 5                | 10.11      | 7.5        | No                               | Yes                | No                         |
| 11 | Female | 12  | High                   | 130.5%        | 13.9        | 8.8                    | 7                | 11.4       | 8.8        | No                               | Yes                | No                         |
| 12 | Male   | 14  | High                   | $\geq$ 30%    | 14.4        | 9.4                    | 8                | 14.4       | 14.4       | No                               | Yes                | No                         |

Hb – haemoglobin; PQ – primaquine

**Figure S11. Estimated percentage of children with G6PD activity  $\geq 30\%$  developing mild, moderate or severe anaemia on days 2-3 or days 5-7 by primaquine daily dose groups**

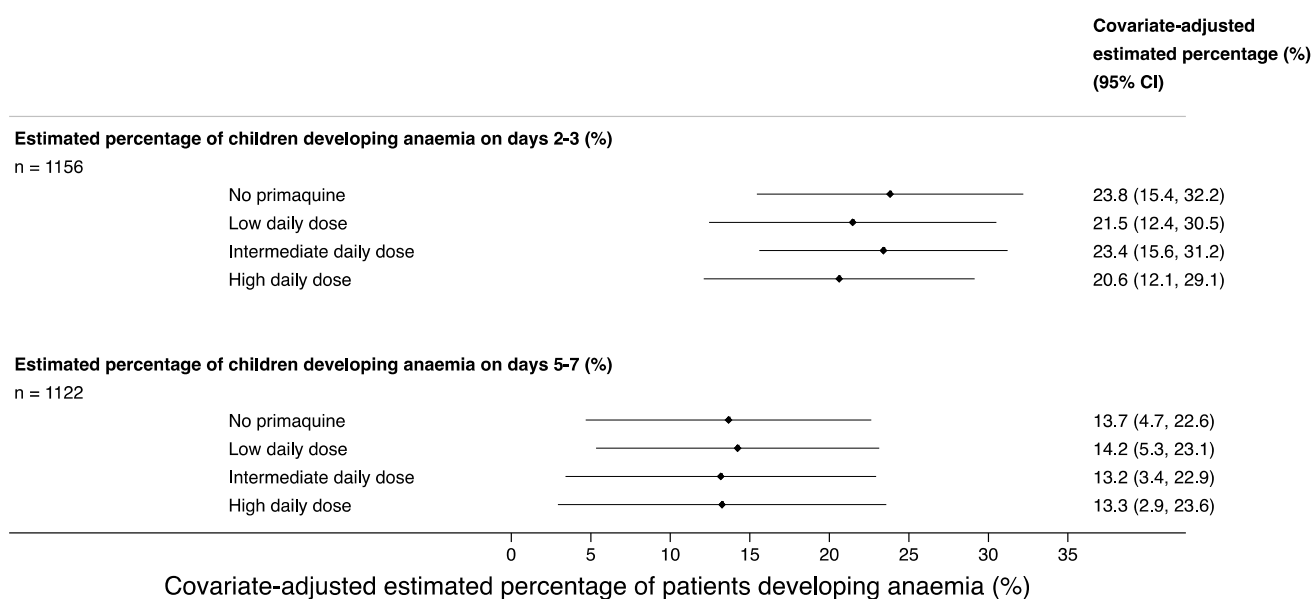

CI – confidence interval; low daily dose  $\sim 0.25$  mg/kg/day; intermediate daily dose  $\sim 5$  mg/kg/day; high daily dose -  $\sim 1$  mg/kg/day; Generalised estimating equations modified Poisson regression models adjusting for age, day 0 haemoglobin, sex (male or female) and  $(\log_{10})$  baseline parasite density, clustering by study site and cluster robust error estimates. Covariate-adjusted percentages were estimated at the mean values of the covariates.



**Table S20. Baseline characteristics and demographic features of patients in the adverse event meta-analysis, by age category**

|                                                                 | Age group (years)    |                     |                      |
|-----------------------------------------------------------------|----------------------|---------------------|----------------------|
|                                                                 | Overall<br>N=1,797   | <5<br>N=293         | 5-<15<br>N=1,504     |
| <b>Sex</b>                                                      |                      |                     |                      |
| Male                                                            | 998 (55.5)           | 154 (52.6)          | 844 (56.1)           |
| Female                                                          | 799 (44.5)           | 139 (47.4)          | 660 (43.9)           |
| <b>Enrolment variables</b>                                      |                      |                     |                      |
| Age, years                                                      | 9.0 (6.0-12.0)       | 3.2 (2.4-4.0)       | 10.0 (7.5-12.4)      |
| Weight (kg)                                                     | 23.4 (16.4-32.0)     | 12.0 (11.0-14.1)    | 26.0 (20.0-34.0)     |
| Presence of fever                                               | 1,686 (93.8)         | 280 (95.6)          | 1,406 (93.5)         |
| Parasitaemia, parasites/mL                                      | 4,400 (1,596-10,900) | 5,281(2,037-12,009) | 4,176 (1,504-10,676) |
| Haemoglobin day 0, g/dL                                         | 11.7 (1.4)           | 10.9 (1.3)          | 11.8 (1.4)           |
| <b>Schizontocidal treatment</b>                                 |                      |                     |                      |
| Chloroquine                                                     | 1,052 (58.5)         | 171 (58.4)          | 881 (58.6)           |
| Artemether-lumefantrine                                         | 82 (4.6)             | 18 (6.1)            | 64 (4.3)             |
| Artesunate                                                      | 55 (3.1)             | 18 (6.1)            | 37 (2.5)             |
| Dihydroartemisinin-piperaquine                                  | 576 (32.1)           | 84 (28.7)           | 492 (32.7)           |
| Artesunate-SP                                                   | 32 (1.8)             | 2 (0.7)             | 30 (2.0)             |
| <b>Primaquine dosing</b>                                        |                      |                     |                      |
| PQ total mg/kg dose                                             | 7.0 (6.4-7.8)        | 7.0 (6.6-7.1)       | 7.0 (6.3-8.0)        |
| <b>Primaquine total dose categories</b>                         |                      |                     |                      |
| No primaquine                                                   | 508 (28.3)           | 94 (32.1)           | 414 (27.5)           |
| Very low dose primaquine (<2mg/kg)                              | 22 (1.2)             | 3 (1.0)             | 19 (1.3)             |
| Low dose total primaquine (2-<5mg/kg)                           | 196 (10.9)           | 31 (10.6)           | 165 (11.0)           |
| High dose total primaquine (≥5mg/kg)                            | 1,071 (59.6)         | 165 (56.3)          | 906 (60.2)           |
| <b>Primaquine daily dose categories</b>                         |                      |                     |                      |
| No primaquine                                                   | 508 (28.3)           | 94 (32.1)           | 414 (27.5)           |
| Low dose (<0.375mg/kg/day)                                      | 185 (10.3)           | 29 (9.9)            | 156 (10.4)           |
| Intermediate dose (0.375-<0.75mg/kg/day)                        | 561 (31.2)           | 89 (30.4)           | 472 (31.4)           |
| High dose (≥0.75mg/kg/day)                                      | 543 (30.2)           | 81 (27.6)           | 462 (30.7)           |
| <b>Primaquine duration</b>                                      |                      |                     |                      |
| 7 days                                                          | 520/1,289 (40.3)     | 72/199 (36.2)       | 448/1,090 (41.1)     |
| 14 days                                                         | 769/1,289 (59.7)     | 127/199 (63.8)      | 642/1,090 (58.9)     |
| <b>Region</b>                                                   |                      |                     |                      |
| Africa                                                          | 426 (23.7)           | 84 (28.7)           | 342 (22.7)           |
| Asia-Pacific                                                    | 1,371 (76.3)         | 209 (71.3)          | 1,162 (77.3)         |
| <b>G6PD status (data from qualitative or quantitative test)</b> |                      |                     |                      |
| Deficient (<30% activity)                                       | 1 (0.1)              | 0 (0.0)             | 1 (0.1)              |
| Intermediate (≥30 & <70% activity)                              | 18 (1.0)             | 3 (1.0)             | 15 (1.0)             |
| Normal*                                                         | 1,540 (85.7)         | 255 (87.0)          | 1,285 (85.4)         |
| Unknown                                                         | 238 (13.2)           | 35 (11.9)           | 203 (13.5)           |

CI – confidence interval; G6PD – glucose-6-phosphate dehydrogenase; PQ – primaquine; Data recorded as number (%), median (range), or n/N (%); 4 children aged less than 12 months are included in the dataset, of

these 3 received primaquine; \* Patients were classified as normal if they were not identified as deficient on a qualitative test in some studies or if they had G6PD activity  $\geq 70\%$  on a quantitative test in other studies.

**Table S21. Patients reporting at least one adverse event within 28 days of initiating primaquine (or equivalent time schedule in placebo / no primaquine groups) in patients with *P. vivax* or mixed malaria infection, by age category and primaquine dose**

| Primaquine group        | All                 | <5years          | 5 to <15 years      |
|-------------------------|---------------------|------------------|---------------------|
| Any                     | 403/1,797<br>(22.4) | 61/293<br>(20.8) | 342/1,504<br>(22.7) |
| No primaquine           | 66/508<br>(13.0)    | 17/94<br>(18.1)  | 49/414<br>(11.8)    |
| Low daily dose          | 36/185<br>(19.4)    | 3/29<br>(10.3)   | 23/156<br>(14.7)    |
| Intermediate daily dose | 144/561<br>(25.7)   | 21/89<br>(23.6)  | 123/472<br>(26.1)   |
| High daily dose         | 167/543<br>(30.8)   | 20/81<br>(24.7)  | 147/462<br>(31.8)   |

n with adverse event/N evaluated (%) is shown; low dose – <0.375 mg/kg/day; intermediate dose – 0.375-<0.75 mg/kg/day; high dose - ≥0.75 mg/kg/day.

**Table S22. Patients with any abdominal pain within 28 days of initiating primaquine (or equivalent time schedule in placebo / no primaquine groups) in patients with *P. vivax* or mixed malaria infection, by age category and primaquine dose**

| Primaquine group        | All                | <5years        | 5 to <15 years     |
|-------------------------|--------------------|----------------|--------------------|
| Any                     | 113/1,797<br>(6.3) | 4/293<br>(1.4) | 109/1,504<br>(7.3) |
| No primaquine           | 9/508<br>(1.8)     | 0/94<br>(0.0)  | 9/414<br>(2.2)     |
| Low daily dose          | 3/185<br>(1.6)     | 0/29<br>(0.0)  | 3/156<br>(1.9)     |
| Intermediate daily dose | 38/561<br>(6.8)    | 1/89<br>(1.1)  | 37/472<br>(7.8)    |
| High daily dose         | 63/543<br>(11.6)   | 3/81<br>(3.7)  | 60/462<br>(13.0)   |

n with adverse event/N evaluated (%) is shown; low dose – <0.375 mg/kg/day; intermediate dose – 0.375-<0.75 mg/kg/day; high dose - ≥0.75 mg/kg/day.

**Table S23. Patients with any anaemia\* within 28 days of initiating primaquine (or equivalent time schedule in placebo / no primaquine groups) in patients with *P. vivax* or mixed malaria infection, by age category and primaquine dose**

| Primaquine group        | All               | <5years      | 5 to <15 years |
|-------------------------|-------------------|--------------|----------------|
| Any                     | 43/1,797<br>(2.4) | 10/293 (3.4) | 33/1,504(2.2)  |
| No primaquine           | 0/508<br>(0.0)    | 0/94 (0.0)   | 0/414 (0.0)    |
| Low daily dose          | 2/185<br>(1.1)    | 0/29 (0.0)   | 2/156 (1.3)    |
| Intermediate daily dose | 23/561<br>(4.1)   | 6/89 (6.7)   | 17/472 (3.6)   |
| High daily dose         | 18/543<br>(3.3)   | 4/81 (4.9)   | 14/462 (3.0)   |

n with adverse event/N evaluated (%) is shown; \*Defined per study (See Table S2); low dose – <0.375 mg/kg/day; Intermediate dose – 0.375-<0.75 mg/kg/day; high dose - ≥0.75 mg/kg/day.

**Table S24. Patients with any methaemoglobinaemia\* reported within 28 days of initiating primaquine (or equivalent time schedule in placebo / no primaquine groups) in patients with *P. vivax* or mixed malaria infection, by age category and primaquine dose**

| Primaquine group        | All               | <5years        | 5 to <15 years    |
|-------------------------|-------------------|----------------|-------------------|
| Any                     | 11/1,797<br>(0.6) | 1/293<br>(0.3) | 10/1,504<br>(0.7) |
| No primaquine           | 0/508<br>(0.0)    | 0/94<br>(0.0)  | 0/414<br>(0.0)    |
| Low daily dose          | 0/185<br>(0.0)    | 0/29<br>(0.0)  | 0/156<br>(0.0)    |
| Intermediate daily dose | 3/561<br>(0.5)    | 0/89<br>(0.0)  | 3/472<br>(0.6)    |
| High daily dose         | 8/543<br>(1.5)    | 1/81<br>(1.2)  | 7/462<br>(1.5)    |

n with adverse event/N evaluated (%) is shown; \*Includes MedDRA preferred term of cyanosis; low dose – <0.375 mg/kg/day; Intermediate dose – 0.375-<0.75 mg/kg/day; high dose - ≥0.75 mg/kg/day.

**Table S25. Patients with any diarrhoea within 28 days of initiating primaquine (or equivalent time schedule in placebo / no primaquine groups) in patients with *P. vivax* or mixed malaria infection, by age category and primaquine dose**

| Primaquine group        | All               | <5years        | 5 to <15 years    |
|-------------------------|-------------------|----------------|-------------------|
| Any                     | 18/1,797<br>(1.0) | 5/293<br>(1.7) | 13/1,504<br>(0.9) |
| No primaquine           | 6/508<br>(1.2)    | 1/94<br>(1.1)  | 5/414<br>(1.2)    |
| Low daily dose          | 1/185<br>(0.5)    | 1/29<br>(3.5)  | 0/156<br>(0.0)    |
| Intermediate daily dose | 4/561<br>(0.7)    | 1/89<br>(1.1)  | 3/472<br>(0.6)    |
| High daily dose         | 7/543<br>(1.3)    | 2/81<br>(2.5)  | 5/462<br>(1.1)    |

n with adverse event/N evaluated (%) is shown; low dose – <0.375 mg/kg/day; Intermediate dose – 0.375-<0.75 mg/kg/day; high dose - ≥0.75 mg/kg/day.

**Table S26. Patients with any anorexia within 28 days of initiating primaquine (or equivalent time schedule in placebo / no primaquine groups) in patients with *P. vivax* or mixed malaria infection, by age category and primaquine dose**

| Primaquine group        | All               | <5years        | 5 to <15 years    |
|-------------------------|-------------------|----------------|-------------------|
| Any                     | 21/1,797<br>(1.2) | 4/293<br>(1.4) | 17/1,504<br>(1.1) |
| No primaquine           | 4/508<br>(0.8)    | 1/94<br>(1.1)  | 3/414<br>(0.7)    |
| Low daily dose          | 8/185<br>(4.3)    | 2/29<br>(6.9)  | 6/156<br>(3.9)    |
| Intermediate daily dose | 5/561<br>(0.9)    | 0/89<br>(0.0)  | 5/472<br>(1.1)    |
| High daily dose         | 4/543<br>(0.7)    | 1/81<br>(1.2)  | 3/462<br>(0.7)    |

n with adverse event/N evaluated (%) is shown; low dose – <0.375 mg/kg/day; Intermediate dose – 0.375-<0.75 mg/kg/day; high dose - ≥0.75 mg/kg/day.



**Table S27. Patients with any vomiting within 28 days of initiating primaquine (or equivalent time schedule in placebo / no primaquine groups) in patients with *P. vivax* or mixed malaria infection, by age category and primaquine dose**

| Primaquine group        | All               | <5years        | 5 to <15 years    |
|-------------------------|-------------------|----------------|-------------------|
| Any                     | 28/1,797<br>(1.6) | 6/293<br>(2.1) | 22/1,504<br>(1.5) |
| No primaquine           | 6/508<br>(1.2)    | 2/94<br>(2.1)  | 4/414<br>(1.0)    |
| Low daily dose          | 2/185<br>(1.1)    | 0/29<br>(0.0)  | 2/156<br>(1.3)    |
| Intermediate daily dose | 8/561<br>(1.4)    | 2/89<br>(2.3)  | 6/472<br>(1.3)    |
| High daily dose         | 12/543<br>(2.2)   | 2/81<br>(2.5)  | 10/462<br>(2.2)   |

n with adverse event/N evaluated (%) is shown; low dose – <0.375 mg/kg/day; Intermediate dose – 0.375-<0.75 mg/kg/day; high dose -  $\geq$ 0.75 mg/kg/day.

**Table S28: Description of serious adverse events considered by study investigator to be primaquine related (possibly, probably or definitely related)**

| Study                 | Country   | Sch | Primaquine regimen                              | Age (yr) | Sex | G6PD Status                                                              | Description                                                                                      | Management                                                               | Criteria for SAE Report                     | Severity* | Outcome       | Causality#         |
|-----------------------|-----------|-----|-------------------------------------------------|----------|-----|--------------------------------------------------------------------------|--------------------------------------------------------------------------------------------------|--------------------------------------------------------------------------|---------------------------------------------|-----------|---------------|--------------------|
| <b>Haematological</b> |           |     |                                                 |          |     |                                                                          |                                                                                                  |                                                                          |                                             |           |               |                    |
| Taylor 2019           | Ethiopia  | CQ  | Intermediate daily dose Primaquine over 14 days | 3        | M   | Screened as G6PD Normal ( $\geq 30\%$ )                                  | Haemolysis 3 days after starting PQ; Hb drop from 10.2 to 6.8/dL                                 | Primaquine permanently discontinued, not hospitalised                    | Lab: Fall in Hb below 7g/dl                 | Severe    | Full recovery | Probably related   |
| Taylor 2019           | Indonesia | DHP | High Daily dose Primaquine over 7 days          | 11       | F   | G6PD Normal ( $>30\%$ ). Subsequent Spectrophotometry G6PD activity =37% | Drop in Hb (haemolysis) to less than 7g/dL (from 11.6 to 6.9) on day 3 after starting primaquine | Temporary discontinuation of primaquine for 1 day, then completed course | Lab: Fall in Hb below 7g/dl                 | Moderate  | Full recovery | Possibly related   |
| Chu 2019              | Thailand  | DHP | High Daily dose Primaquine over 7 days          | 13       | F   | Screened G6PD Normal ( $\geq 30\%$ ). Subsequent Spectro activity = 62%" | Haemolysis 5 days after starting primaquine. Hb fell from 8.8 to 4.4g/dL                         | Primaquine ceased. Hospitalised for blood transfusion                    | Clinical: Blood transfusion                 | Severe    | Full recovery | Probably related   |
| Chu 2019              | Thailand  | CQ  | Intermediate daily dose Primaquine over 14 days | 13       | M   | Screened as G6PD Normal ( $\geq 30\%$ )                                  | Methaemoglobinaemia (and scrub typhus) on day 6 after starting primaquine                        | Hospitalised, primaquine ceased                                          | Clinical: Hospitalised                      | Severe    | Full recovery | Probably related   |
| Taylor 2019           | Indonesia | DHP | High Daily dose Primaquine over 7 days          | 11       | F   | Screened as G6PD Normal ( $\geq 30\%$ )                                  | Methaemoglobinaemia (symptomatic) and bronchopneumonia on day 10 after starting primaquine       | Hospitalised, primaquine permanently ceased                              | Clinical: Hospitalised                      | Severe    | Full recovery | Definitely related |
| Chu 2019              | Thailand  | DHP | Intermediate daily dose Primaquine over 14 days | 14       | M   | Screened as G6PD Normal ( $\geq 30\%$ )                                  | Methaemoglobinaemia on day 12 after starting primaquine                                          | Hospitalised for observation, primaquine ceased                          | Clinical (peri-oral cyanosis): Hospitalised | Moderate  | Full recovery | Probably related   |
| Chu 2019              | Thailand  | DHP | High Daily dose Primaquine over 7 days          | 4        | F   | Screened as G6PD Normal ( $\geq 30\%$ )                                  | Methaemoglobinaemia on day 5 after starting primaquine                                           | Hospitalised for observation, primaquine ceased                          | Clinical (peri-oral cyanosis): Hospitalised | Moderate  | Full recovery | Probably related   |

|                              |             |     |                                                 |    |   |                                         |                                                                             |                                                                                    |                                             |          |                   |                  |
|------------------------------|-------------|-----|-------------------------------------------------|----|---|-----------------------------------------|-----------------------------------------------------------------------------|------------------------------------------------------------------------------------|---------------------------------------------|----------|-------------------|------------------|
| Chu 2019                     | Thailand    | DHP | High Daily dose Primaquine over 7 days          | 14 | M | Screened as G6PD Normal ( $\geq 30\%$ ) | Methaemoglobinaemia on day 5 after starting primaquine                      | Hospitalised for observation, primaquine ceased                                    | Clinical (peri-oral cyanosis): Hospitalised | Moderate | Lost to follow up | Probably related |
| Chu 2019                     | Thailand    | CQ  | High Daily dose Primaquine over 7 days          | 5  | M | Screened as G6PD Normal ( $\geq 30\%$ ) | Methaemoglobinaemia on day 5 after starting primaquine                      | Hospitalised for observation, primaquine ceased                                    | Clinical (peri-oral cyanosis): Hospitalised | Moderate | Full recovery     | Probably related |
| <b>Gastrointestinal SAEs</b> |             |     |                                                 |    |   |                                         |                                                                             |                                                                                    |                                             |          |                   |                  |
| Taylor 2019                  | Ethiopia    | CQ  | High Daily dose Primaquine over 7 days          | 13 | F | Screened as G6PD Normal ( $\geq 30\%$ ) | Severe persistent vomiting for 4 days from 2 days after starting primaquine | Hospitalised, primaquine temporarily ceased for 3 days, then completed full course | Clinical: Hospitalised                      | Severe   | Full recovery     | Possibly related |
| Taylor 2019                  | Indonesia   | DHP | High Daily dose Primaquine over 7 days          | 9  | F | Screened as G6PD Normal ( $\geq 30\%$ ) | Moderate dyspepsia (epigastric pain) 4 days after starting primaquine       | Temporarily discontinued primaquine for 3 days                                     | Clinical: Hospitalised                      | Moderate | Full recovery     | Possibly related |
| Taylor 2019                  | Vietnam     | CQ  | High Daily dose Primaquine over 7 days          | 7  | F | Screened as G6PD Normal ( $\geq 30\%$ ) | Moderate diarrhoea for 4 days from day 7 after starting PQ                  | Temporarily ceased primaquine for 3 days, then completed course                    | Clinical: Hospitalised                      | Moderate | Full recovery     | Possibly related |
| <b>Hepatobiliary SAEs</b>    |             |     |                                                 |    |   |                                         |                                                                             |                                                                                    |                                             |          |                   |                  |
| Awab 2017                    | Afghanistan | CQ  | Low daily Primaquine over 14 days               | 13 | M | Screened as G6PD Normal ( $\geq 30\%$ ) | Jaundice and haemoglobinuria 2 days after starting primaquine               | Primaquine stopped for two days to day 7, changed to weekly dose                   | Clinical: important medical event           | Moderate | Full recovery     | Possibly related |
| <b>Other Related SAEs</b>    |             |     |                                                 |    |   |                                         |                                                                             |                                                                                    |                                             |          |                   |                  |
| Chu 2019                     | Thailand    | DHP | Intermediate daily dose Primaquine over 14 days | 14 | F | Screened as G6PD Normal ( $\geq 30\%$ ) | Pneumonia/oesophagitis on day 16 after starting primaquine                  | Hospitalised, IV antibiotics                                                       | Clinical: Hospitalised                      | Moderate | Full recovery     | Possibly related |

|              |                 |    |                                         |    |   |         |                                                                                                                                                  |                                                         |                           |        |               |                     |
|--------------|-----------------|----|-----------------------------------------|----|---|---------|--------------------------------------------------------------------------------------------------------------------------------------------------|---------------------------------------------------------|---------------------------|--------|---------------|---------------------|
| Awab<br>2017 | Afghanist<br>an | CQ | Low daily<br>Primaquine<br>over 14 days | 13 | F | Missing | Anaemia, tachycardia,<br>lethargy and abdominal pain<br>severe on day 7 after starting<br>primaquine. Hb did not fall by<br>≥2 g/dL or to <7g/dL | Hospitalised on<br>day 7 and<br>withdrawn from<br>study | Clinical:<br>Hospitalised | Severe | Full recovery | Possibly<br>related |
|--------------|-----------------|----|-----------------------------------------|----|---|---------|--------------------------------------------------------------------------------------------------------------------------------------------------|---------------------------------------------------------|---------------------------|--------|---------------|---------------------|

Sch - Schizonticide; CQ - chloroquine, DHP - dihydroartemisinin-piperaquine; NA - not available; M - Male; F - Female; \*Severity at highest when more than one event; # Causality defined according to categorisation by original study investigators.

## References S1.

47. World Health Organization. WHO Child Growth Standards: Length/height-for-age, weight-for-age, weight-for-length, weight-for-height and body mass index-for-age: Methods and development. Geneva, 2006.
48. Battle KE, Lucas TCD, Nguyen M, et al. Mapping the global endemicity and clinical burden of *Plasmodium vivax*, 2000-17: a spatial and temporal modelling study. *Lancet* 2019.
49. Battle KE, Karhunen MS, Bhatt S, et al. Geographical variation in *Plasmodium vivax* relapse. *Malar J* 2014; **13**: 144.
50. Gaedigk A, Sangkuhl K, Whirl-Carrillo M, Klein T, Leeder JS. Prediction of CYP2D6 phenotype from genotype across world populations. *Genet Med* 2017; **19**(1): 69-76.
51. Gaedigk A, Simon SD, Pearce RE, Bradford LD, Kennedy MJ, Leeder JS. The CYP2D6 activity score: translating genotype information into a qualitative measure of phenotype. *Clin Pharmacol Ther* 2008; **83**(2): 234-42.
52. Caudle KE, Sangkuhl K, Whirl-Carrillo M, et al. Standardizing CYP2D6 Genotype to Phenotype Translation: Consensus Recommendations from the Clinical Pharmacogenetics Implementation Consortium and Dutch Pharmacogenetics Working Group. *Clin Transl Sci* 2020; **13**(1): 116-24.
53. Carmona-Fonseca J, Maestre A. Prevention of *Plasmodium vivax* malaria recurrence: efficacy of the standard total dose of primaquine administered over 3 days. *Acta Trop* 2009; **112**(2): 188-92.
54. Carmona-Fonseca J. Vivax malaria in children: Recurrences with standard total dose of primaquine administered in 3 vs. 7 days *Iatreia* 2010; **23**(1): 10-20.
55. Kheng S, Muth S, Taylor WR, et al. Tolerability and safety of weekly primaquine against relapse of *Plasmodium vivax* in Cambodians with glucose-6-phosphate dehydrogenase deficiency. *BMC Med* 2015; **13**: 203.
56. Valecha N, Savargaonkar D, Srivastava B, et al. Comparison of the safety and efficacy of fixed-dose combination of artemolane maleate and piperazine phosphate with chloroquine in acute, uncomplicated *Plasmodium vivax* malaria: a phase III, multicentric, open-label study. *Malar J* 2016; **15**: 42.
57. Dharmawardena P, Rodrigo C, Mendis K, et al. Response of imported malaria patients to antimalarial medicines in Sri Lanka following malaria elimination. *PLoS One* 2017; **12**(11): e0188613.
58. Mekonnen DA, Abadura GS, Behaksra SW, et al. Treatment of uncomplicated *Plasmodium vivax* with chloroquine plus radical cure with primaquine without G6PDd testing is safe in Arba Minch, Ethiopia: assessment of clinical and parasitological response. *Malar J* 2023; **22**(1): 135.
59. Moore BR, Salman S, Tobe R, et al. Short-course, high-dose primaquine regimens for treatment of liver-stage vivax malaria in children. *Int J Infect Dis* 2023.
60. Arcelia F, Pasaribu AP, Yanni GN. Effectiveness of dihydroartemisinin-piperazine after 10 years as treatment for vivax malaria in Indonesia. *J Infect Dev Ctries* 2023; **17**(5): 700-6.
61. Malla P, Wang Z, Brashear A, et al. Effectiveness of an Unsupervised Primaquine Regimen for Preventing *Plasmodium vivax* Malaria Relapses in Northeast Myanmar: A Single-Arm Nonrandomized Observational Study. *J Infect Dis* 2024; **229**(5): 1557-64.
62. Liu H, Xu JW, Deng DW, et al. Artemisinin-naphthoquine plus lower-dose primaquine to treat and prevent recurrence of *Plasmodium vivax* malaria: an open-label randomized and non-inferiority trial. *Parasit Vectors* 2024; **17**(1): 28.

63. Gebrie H, Yimer M, Ayehu A, et al. Efficacy and safety of chloroquine plus primaquine for the treatment of Plasmodium vivax malaria in Hamusit site, Northwestern Ethiopia. *Malar J* 2024; **23**(1): 202.
64. Manh ND, Thanh NV, Quang HH, et al. Therapeutic efficacy of pyronaridine-artesunate (Pyramax) in treating Plasmodium vivax malaria in the central highlands of Vietnam. *Antimicrob Agents Chemother* 2024: e0004424.
65. Villalobos-Salcedo JM, Tada MS, Kimura E, Menezes MJ, Pereira da Silva LH. In-vivo sensitivity of Plasmodium vivax isolates from Rondônia (western Amazon region, Brazil) to regimens including chloroquine and primaquine. *Ann Trop Med Parasitol* 2000; **94**(8): 749-58.
66. Eibach D, Ceron N, Krishnalall K, et al. Therapeutic efficacy of artemether-lumefantrine for Plasmodium vivax infections in a prospective study in Guyana. *Malar J* 2012; **11**: 347.
67. Leslie T, Rab MA, Ahmadzai H, et al. Compliance with 14-day primaquine therapy for radical cure of vivax malaria--a randomized placebo-controlled trial comparing unsupervised with supervised treatment. *Trans R Soc Trop Med Hyg* 2004; **98**(3): 168-73.
68. Orjuela-Sanchez P, da Silva NS, da Silva-Nunes M, Ferreira MU. Recurrent parasitemias and population dynamics of Plasmodium vivax polymorphisms in rural Amazonia. *Am J Trop Med Hyg* 2009; **81**(6): 961-8.
69. Van den Eede P, Soto-Calle VE, Delgado C, et al. Plasmodium vivax sub-patent infections after radical treatment are common in Peruvian patients: results of a 1-year prospective cohort study. *PLoS One* 2011; **6**(1): e16257.
70. Betuela I, Rosanas-Urgell A, Kiniboro B, et al. Relapses contribute significantly to the risk of Plasmodium vivax infection and disease in Papua New Guinean children 1-5 years of age. *J Infect Dis* 2012; **206**(11): 1771-80.
71. Negreiros S, Farias S, Viana GM, et al. Efficacy of Chloroquine and Primaquine for the Treatment of Uncomplicated Plasmodium vivax Malaria in Cruzeiro do Sul, Brazil. *Am J Trop Med Hyg* 2016; **95**(5): 1061-8.
72. Pham TV, Nguyen HV, Aguirre AR, et al. Plasmodium vivax morbidity after radical cure: A cohort study in Central Vietnam. *PLoS Med* 2019; **16**(5): e1002784.
73. Abdon NP, Pinto AY, da Silva Rdo S, de Souza JM. [Assessment of the response to reduced treatment schemes for vivax malaria]. *Rev Soc Bras Med Trop* 2001; **34**(4): 343-8.
74. Buchachart K, Krudsood S, Singhasivanon P, et al. Effect of primaquine standard dose (15 mg/day for 14 days) in the treatment of vivax malaria patients in Thailand. *Southeast Asian J Trop Med Public Health* 2001; **32**(4): 720-6.
75. Solari Soto L, Soto Tarazona AR, Mendoza Requena D, Llanos Cuentas EA. Ensayo clinico del tratamiento de la malaria vivax con esquema acortado de primaquina comparado con el esquema tradicional. *Rev Soc Peru Med Interna* 2002; **15**(4): 197-9.
76. Yadav RS, Ghosh SK. Radical curative efficacy of five-day regimen of primaquine for treatment of Plasmodium vivax malaria in India. *J Parasitol* 2002; **88**(5): 1042-4.
77. Pinto AY, Azevedo CH, da Silva JB, de Souza JM. Assessment of chloroquine single dose treatment of malaria due to Plasmodium vivax in Brazilian Amazon. *Rev Inst Med Trop Sao Paulo* 2003; **45**(6): 327-31.
78. Maguire JD, Krisin, Marwoto H, Richie TL, Fryauff DJ, Baird JK. Mefloquine is highly efficacious against chloroquine-resistant Plasmodium vivax malaria and Plasmodium falciparum malaria in Papua, Indonesia. *Clin Infect Dis* 2006; **42**(8): 1067-72.
79. Krudsood S, Tangpukdee N, Wilairatana P, et al. High-dose primaquine regimens against relapse of Plasmodium vivax malaria. *Am J Trop Med Hyg* 2008; **78**(5): 736-40.

80. Nateghpour M, Edrissian G, Torabi A, et al. Monitoring of Plasmodium vivax and Plasmodium falciparum response to chloroquine in Bandar-Abbas district, Hormozgan province, Iran. [Arabic]. *Tehran Uni Med J* 2009; **67**(3): 178-83.
81. Takeuchi R, Lawpoolsri S, Imwong M, et al. Directly-observed therapy (DOT) for the radical 14-day primaquine treatment of Plasmodium vivax malaria on the Thai-Myanmar border. *Malar J* 2010; **9**: 308.
82. Maneeboonyang W, Lawpoolsri S, Puangsa-Art S, et al. Directly observed therapy with primaquine to reduce the recurrence rate of plasmodium vivax infection along the Thai-Myanmar border. *Southeast Asian J Trop Med Public Health* 2011; **42**(1): 9-18.
83. Graf PC, Durand S, Alvarez Antonio C, et al. Failure of Supervised Chloroquine and Primaquine Regimen for the Treatment of Plasmodium vivax in the Peruvian Amazon. *Malar Res Treat* 2012; **2012**: 936067.
84. Pedro RS, Guaraldo L, Campos DP, Costa AP, Daniel-Ribeiro CT, Brasil P. Plasmodium vivax malaria relapses at a travel medicine centre in Rio de Janeiro, a non-endemic area in Brazil. *Malar J* 2012; **11**: 245.
85. Ganguly S, Saha P, Guha SK, et al. In vivo therapeutic efficacy of chloroquine alone or in combination with primaquine against vivax malaria in Kolkata, West Bengal, India, and polymorphism in pvmdr1 and pvcr1-o genes. *Antimicrob Agents Chemother* 2013; **57**(3): 1246-51.
86. Liu H, Yang HL, Xu JW, Wang JZ, Nie RH, Li CF. Artemisinin-naphthoquine combination versus chloroquine-primaquine to treat vivax malaria: an open-label randomized and non-inferiority trial in Yunnan Province, China. *Malar J* 2013; **12**: 409.
87. Miahpour A, Keshavarz H, Heidari A, Raeisi A, Rezaeian M, Rezaei S. Assessment of the efficacy of 8 weeks of primaquine for the prevention of relapse in vivax malaria patients using SSCP-PCR and sequencing in South and South-East Iran, 2008-2011. *Trans R Soc Trop Med Hyg* 2013; **107**(7): 420-6.
88. Zhu G, Lu F, Cao J, et al. Blood stage of Plasmodium vivax in central China is still susceptible to chloroquine plus primaquine combination therapy. *Am J Trop Med Hyg* 2013; **89**(1): 184-7.
89. Delgado-Ratto C, Soto-Calle VE, Van den Eede P, et al. Population structure and spatio-temporal transmission dynamics of Plasmodium vivax after radical cure treatment in a rural village of the Peruvian Amazon. *Malar J* 2014; **13**: 8.
90. Mac Donald-Ottevanger MS, Adhin MR, Jitan JK, Bretas G, Vreden SG. Primaquine double dose for 7 days is inferior to single-dose treatment for 14 days in preventing Plasmodium vivax recurrent episodes in Suriname. *Infect Drug Resist* 2018; **11**: 3-8.
91. Azarian Moghadam HN, Raeisi M, Motevalli Haghi A, Edrissian A, Farivar G. Monitoring the Response of Plasmodium vivax to Chloroquine and Uncomplicated P. falciparum to Artesunate-fansidar Antimalarials in Southeastern Iran. *Iran J Parasitol* 2018; **13**(1): 31-8.
92. Han KT, Lin K, Han ZY, et al. Efficacy and Safety of Pyronaridine-Artesunate for the Treatment of Uncomplicated Plasmodium falciparum and Plasmodium vivax Malaria in Myanmar. *Am J Trop Med Hyg* 2020; **103**(3): 1088-93.
93. Shaikh S, Chohan MN, Touseef M, Buriro HWA, Shah MA, Muzaffar S. Safety of Weekly Primaquine in Glucose 6 Phosphatase Dehydrogenase (G6PD) Deficient Children. *J Pharm Res Int* 2021; **33**(57B): 452-8.
